# Supplementary material
Source: publisher figshare collection journal article supplement (https://brill.figshare.com/articles/dataset/_/12249788)
Supplement: Supplementary file 1 [file 1]

## Sheet: Blad1
(sub)species	BOLD BIN	voucher collection no.	country	locality	date collected	collected by:	identified by:	COI (br)	COI (br) sequence
Ptomaphagus medius	AAU6931	10PHMAL-0224	Canada	Ontario: Puslinch Township	2010-05-18	Paul Hebert	Paul Hebert	624 bp (Genbank: KR485203)	ACCTTATACTTTATTTTTGGAGCATGAGCAGGAATAGTAGGTACTTCTTTAAGACTTTTAATTCGAGCAGAATTAGGAAACCCGGGTAGATTAATTGGTGATGATCAAATTTATAATGTAATTGTTACTGCCCACGCTTTTATTATAATTTTTTTCATAGTTATACCAATCATAATTGGAGGATTTGGAAATTGATTAGTACCTTTAATATTAGGAGCTCCTGATATAGCATTTCCTCGAATAAACAATATAAGATTTTGACTTTTACCTCCTTCATTAACTTTATTATTAATAAGAAGAATAGTTGAAAACGGAGCAGGAACTGGATGAACAGTTTATCCTCCTTTATCTTCTAATATTGCTCATAGAGGATCTTCAGTAGATTTAGCAATTTTTAGA…
Ptomaphagus medius	AAU6931	10PHMAL-0225	Canada	Ontario: Puslinch Township	2010-05-18	Paul Hebert	Paul Hebert	593 bp (Genbank: KR485002)	ACCTTATACTTTATTTTTGGAGCATGAGCAGGAATAGTAGGTACTTCTTTAAGACTTTTAATTCGAGCAGAATTAGGAAACCCGGGTAGATTAATTGGTGATGATCAAATTTATAATGTAATTGTTACTGCCCACGCTTTTATTATAATTTTTTTCATAGTTATACCAATCATAATTGGAGGATTTGGAAATTGATTAGTACCTTTAATATTAGGAGCTCCTGATATAGCATTTCCTCGAATAAACAATATAAGATTTTGACTTTTACCTCCTTCATTAACTTTATTATTAATAAGAAGAATAGTTGAAAACGGAGCAGGAACTGGATGAACAGTTTATCCTCCTTTATCTTCTAATATTGCTCATAGAGGATCTTCAGTAGATTTAGCAATTTTTAGA…
Ptomaphagus medius	AAU6931	10PHMAL-0250	Canada	Ontario: Puslinch Township	2010-05-18	Paul Hebert	Paul Hebert	632 bp (Genbank: KR479979)	TATACTTTATTTTTGGAGCATGAGCAGGAATAGTAGGTACTTCTTTAAGACTTTTAATTCGAGCAGAATTAGGAAACCCGGGTAGATTAATTGGTGATGATCAAATTTATAATGTAATTGTTACTGCCCACGCTTTTATTATAATTTTTTTCATAGTTATACCAATCATAATTGGAGGATTTGGAAATTGATTAGTACCTTTAATATTAGGAGCTCCTGATATAGCATTTCCTCGAATAAACAATATAAGATTTTGACTTTTACCTCCTTCATTAACTTTATTATTAATAAGAAGAATAGTTGAAAACGGAGCAGGAACTGGATGAACAGTTTATCCTCCTTTATCTTCTAATATTGCTCATAGAGGATCTTCAGTAGATTTAGCAATTTTTAGATTAC…
Ptomaphagus medius	AAU6931	10PHMAL-0260	Canada	Ontario: Puslinch Township	2010-05-18	Paul Hebert	Paul Hebert	608 bp (Genbank: KR482419)	ACCTTATACTTTATTTTTGGAGCATGAGCAGGAATAGTAGGTACTTCTTTAAGACTTTTAATTCGAGCAGAATTAGGAAACCCGGGTAGATTAATTGGTGATGATCAAATTTATAATGTAATTGTTACTGCCCACGCTTTTATTATAATTTTTTTCATAGTTATACCAATCATAATTGGAGGATTTGGAAATTGATTAGTACCTTTAATATTAGGAGCTCCTGATATAGCATTTCCTCGAATAAACAATATAAGATTTTGACTTTTACCTCCTTCATTAACTTTATTATTAATAAGAAGAATAGTTGAAAACGGAGCAGGAACTGGATGAACAGTTTATCCTCCTTTATCTTCTAATATTGCTCATAGAGGATCTTCAGTAGATTTAGCAATTTTTAGA…
Ptomaphagus medius	AAU6931	10PHMAL-0290	Canada	Ontario: Puslinch Township	2010-05-18	Paul Hebert	Paul Hebert	635 bp (Genbank: KR484386)	GACCTTATACTTTATTTTTGGAGCATGAGCAGGAATAGTAGGTACTTCTTTAAGACTTTTAATTCGAGCAGAATTAGGAAACCNGGGTAGATTAATTGGTGATGATCAAATTTATAATGTAATTGTTACTGCCCACGCTTTTATTATAATTTTTTTCATAGTTATACCAATCATAATTGGAGGATTTGGAAATTGATTAGTACCTTTAATATTAGGAGCTCCTGATATAGCATTTCCTCGAATAAACAATATAAGATTTTGACTTTTACCTCCTTCATTAACTTTATTATTAATAAGAAGAATAGTTGAAAACGGAGCAGGAACTGGATGAACAGTTTATCCTCCTTTATCTTCTAATATTGCTCATAGAGGATCTTCAGTAGATTTAGCAATTTTTAG…
Ptomaphagus medius	AAU6931	10PHMAL-1767	Canada	Ontario: Puslinch Township	2010-05-29	Paul Hebert	Paul Hebert	636 bp (Genbank: KR490710)	GACCTTATACTTTATTTTTGGAGCATGAGCAGGAATAGTAGGTACTTCTTTAAGACTTTTAATTCGAGCAGAATTAGGAAACCCGGGTAGATTAATTGGTGATGATCAAATTTATAATGTAATTGTTACTGCCCACGCTTTTATTATAATTTTTTTCATAGTTATACCAATCATAATTGGAGGATTTGGAAATTGATTAGTACCTTTAATATTAGGAGCTCCTGATATAGCATTTCCTCGAATAAACAATATAAGATTTTGACTTTTACCTCCTTCATTAACTTTATTATTAATAAGAAGAATAGTTGAAAACGGAGCAGGAACTGGATGAACAGTTTATCCTCCTTTATCTTCTAATATTGCTCATAGAGGATCTTCAGTAGATTTAGCAATTTTTAG…
Ptomaphagus medius	AAU6931	10PHMAL-1782	Canada	Ontario: Puslinch Township	2010-05-29	Paul Hebert	Paul Hebert	563 bp (Genbank: KR487006)	GACCTTATACTTTATTTTTGGAGCATGAGCAGGAATAGTAGGTACTTCTTTAAGACTTTTAATTCGAGCAGAATTAGGAAACCCGGGTAGATTAATTGGTGATGATCAAATTTATAATGTAATTGTTACTGCCCACGCTTTTATTATAATTTTTTTCATAGTTATACCAATCATAATTGGAGGATTTGGAAATTGATTAGTACCTTTAATATTAGGAGCTCCTGATATAGCATTTCCTCGAATAAACAATATAAGATTTTGACTTTTACCTCCTTCATTAACTTTATTATTAATAAGAAGAATAGTTGAAAACGGAGCAGGAACTGGATGAACAGTTTATCCTCCTTTATCTTCTAATATTGCTCATAGAGGATCTTCAGTAGATTTAGCAATTTTTAG…
Ptomaphagus medius	AAU6931	10PHMAL-1787	Canada	Ontario: Puslinch Township	2010-05-29	Paul Hebert	Paul Hebert	632 bp (Genbank: KR488215)	GACCTTATACTTTATTTTTGGAGCATGAGCAGGAATAGTAGGTACTTCTTTAAGACTTTTAATTCGAGCAGAATTAGGAAACCCGGGTAGATTAATTGGTGATGATCAAATTTATAATGTAATTGTTACTGCCCACGCTTTTATTATAATTTTTTTCATAGTTATACCAATCATAATTGGAGGATTTGGAAATTGATTAGTACCTTTAATATTAGGAGCTCCTGATATAGCATTTCCTCGAATAAACAATATAAGATTTTGACTTTTACCTCCTTCATTAACTTTATTATTAATAAGAAGAATAGTTGAAAACGGAGCAGGAACTGGATGAACAGTTTATCCTCCTTTATCTTCTAATATTGCTCATAGAGGATCTTCAGTAGATTTAGCAATTTTTAG…
Ptomaphagus medius	AAU6931	BIOUG00993-H07	Canada	Ontario: Puslinch Township	2010-04-28	Paul Hebert	Paul Hebert	658 bp (Genbank: KR487893)	GACCTTATACTTTATTTNTGGAGCATGAGCAGGAATAGTAGGTACTTCTTTAAGACTTTTAATTCGAGCAGAATTAGGAAACCCGGGTAGATTAATTGGTGATGATCAAATTTATAATGTAATTGTTACTGCCCACGCTTTTATTATAATTTTTTTCATAGTTATACCAATCATAATTGGAGGATTTGGAAATTGATTAGTACCTTTAATATTAGGAGCTCCTGATATAGCATTTCCTCGAATAAACAATATAAGATTTTGACTTTTACCTCCTTCATTAACTTTATTATTAATAAGAAGAATAGTTGAAAACGGAGCAGGAACTGGATGAACAGTTTATCCTCCTTTATCTTCTAATATTGCTCATAGAGGATCTTCAGTAGATTTAGCAATTTTTAG…
Ptomaphagus medius	AAU6931	BIOUG01140-F03	Canada	Ontario: Puslinch Township	2010-07-21	Paul Hebert	Paul Hebert	658 bp (Genbank: KR480128)	GACCTTATACTTTATTTTTGGAGCATGAGCAGGAATAGTAGGTACTTCTTTAAGACTTTTAATTCGAGCAGAATTAGGAAACCCGGGTAGATTAATTGGTGATGATCAAATTTATAATGTAATTGTTACTGCCCACGCTTTTATTATAATTTTTTTCATAGTTATACCAATCATAATTGGAGGATTTGGAAATTGATTAGTACCTTTAATATTAGGAGCTCCTGATATAGCATTTCCTCGAATAAACAATATAAGATTTTGACTTTTACCTCCTTCATTAACTTTATTATTAATAAGAAGAATAGTTGAAAACGGAGCAGGAACTGGATGAACAGTTTATCCTCCTTTATCTTCTAATATTGCTCATAGAGGATCTTCAGTAGATTTAGCAATTTTTAG…
Ptomaphagus medius	AAU6931	BIOUG01144-C04	Canada	Ontario: Puslinch Township	2010-08-04	Paul Hebert	Paul Hebert	572 bp (Genbank: KR490659)	GGAGCATGAGCAGGAATAGTAGGTANTTCTTTAAGACTTTTAATTCGAGCAGAATTAGGAAACCCGGGTAGATTAATTGGTGATGATCAAATTTATAATGTAATTGTTACTGCCCACGCTTTTATTATAATTTTTTTCATAGTTATACCAATCATAATTGGAGGATTTGGAAATTGATTAGTACCTTTAATATTAGGAGCTCCTGATATAGCATTTCCTCGAATAAACAATATAAGATTTTGACTTTTACCTCCTTCATTAACTTTATTATTAATAAGAAGAATAGTTGAAAACGGAGCAGGAACTGGATGAACAGTTTATCCTCCTTTATCTTCTAATATTGCTCATAGAGGATCTTCAGTAGATTTAGCAATTTTTAGATTACATTTAGCAGGAATT…
Ptomaphagus medius	AAU6931	BIOUG02292-H07	Canada	Ontario: Puslinch Township	2010-08-04	Paul Hebert	Angela Telfer	703 bp (Genbank: KR490695)	GACCTTATACTTTATTTTTGGAGCATGAGCAGGAATAGTAGGTACTTCTTTAAGACTTTTAATTCGAGCAGAATTAGGAAACCCGGGTAGATTAATTGGTGATGATCAAATTTATAATGTAATTGTTACTGCCCACGCTTTTATTATAATTTTTTTCATAGTTATACCAATCATAATTGGAGGATTTGGAAATTGATTAGTACCTTTAATATTAGGAGCTCCTGATATAGCATTTCCTCGAATAAACAATATAAGATTTTGACTTTTACCTCCTTCATTAACTTTATTATTAATAAGAAGAATAGTTGAAAACGGAGCAGGAACTGGATGAACAGTTTATCCTCCTTTATCTTCTAATATTGCTCATAGAGGATCTTCAGTAGATTTAGCAATTTTTAG…
Ptomaphagus medius	AAU6931	BIOUG02856-A03	Canada	Ontario: Puslinch Township	2010-06-15	Paul Hebert	--	593 bp (Genbank: KR482861)	CAGCAGAATTAGGAAACCCGGGTAGATTAATTGGTGATGATCAAATTTATAATGTAATTGTTACTGCCCACGCTTTTATTATAATTTTTTTCATAGTTATACCAATCATAATTGGAGGATTTGGAAATTGATTAGTACCTTTAATATTAGGAGCTCCTGATATAGCATTTCCTCGAATAAACAATATAAGATTTTGACTTTTACCTCCTTCATTAACTTTATTATTAATAAGAAGAATAGTTGAAAACGGAGCAGGAACTGGATGAACAGTTTATCCTCCTTTATCTTCTAATATTGCTCATAGAGGATCTTCAGTAGATTTAGCAATTTTTAGATTACATTTAGCAGGAATTAGATCAATTTTAGGAGCTGTAAATTTTATTACAACTGTAATCAATA…
Ptomaphagus medius	AAU6931	BIOUG02856-A06	Canada	Ontario: Puslinch Township	2010-06-15	Paul Hebert	--	576 bp (Genbank: KR479939)	TTTGGAGCATGAGCAGGAATAGTAGGTACTTCTTTA---AGACTTTTAATTCGAGCAGAATTAGGAAACCCGGGTAGATTAATTGGTGAT---GATCAAATTTATAATGTAATTGTTACTGCCCACGCTTTTATTATAATTTTTTTCATAGTTATACCAATCATAATTGGAGGATTTGGAAATTGATTAGTACCTTTAATA---TTAGGAGCTCCTGATATAGCATTTCCTCGAATAAACAATATAAGATTTTGACTTTTACCTCCTTCATTAACTTTATTATTAATAAGAAGAATAGTTGAAAACGGAGCAGGAACTGGATGAACAGTTTATCCTCCTTTATCTTCTAATATTGCTCATAGAGGATCTTCAGTAGATTTA---GCAATTTTTAGATTA…
Ptomaphagus medius	AAU6931	BIOUG02856-B03	Canada	Ontario: Puslinch Township	2010-07-13	Paul Hebert	Angela Telfer	591 bp (Genbank: KR489468)	ACCTTATACTTTATTTTTGGAGCATGAGCAGGAATAGTAGGTACTTCTTTA---AGACTTTTAATTCGAGCAGAATTAGGAAACCCGGGTAGATTAATTGGTGAT---GATCAAATTTATAATGTAATTGTTACTGCCCACGCTTTTATTATAATTTTTTTCATAGTTATACCAATCATAATTGGAGGATTTGGAAATTGATTAGTACCTTTAATA---TTAGGAGCTCCTGATATAGCATTTCCTCGAATAAACAATATAAGATTTTGACTTTTACCTCCTTCATTAACTTTATTATTAATAAGAAGAATAGTTGAAAACGGAGCAGGAACTGGATGAACAGTTTATCCTCCTTTATCTTCTAATATTGCTCATAGAGGATCTTCAGTAGATTTA---…
Ptomaphagus medius	AAU6931	BIOUG02856-B06	Canada	Ontario: Puslinch Township	2010-07-13	Paul Hebert	--	658 bp (Genbank: KR486129)	GACCTTATACTTTATTTTTGGAGCATGAGCAGGAATAGTAGGTACTTCTTTAAGACTTTTAATTCGAGCAGAATTAGGAAACCCGGGTAGATTAATTGGTGATGATCAAATTTATAATGTAATTGTTACTGCCCACGCTTTTATTATANTNTTTTTCATAGTTATACCAATCATAATTGGAGGATTTGGAAATTGATTAGTACCTTTAATATTAGGAGCTCCTGATATAGCATTTCCTCGAATAAACAATATAAGATTTTGACTTTTACCTCCTTCATTAACTTTATTATTAATAAGAAGAATAGTTGAAAACGGAGCAGGAACTGGATGAACAGTTTATCCTCCTTTATCTTCTAATATTGCTCATAGAGGATCTTCAGTAGATTTAGCAATTTTTAG…
Ptomaphagus medius	AAU6931	BIOUG02856-D08	Canada	Ontario: Puslinch Township	2010-06-12	Paul Hebert	--	615 bp (Genbank: KR490541)	ACTTCTTTAAGACTTTTAATTCGAGCAGAATTAGGAAACCCGGGTAGATTAATTGGTGATGATCAAATTTATAATGTAATTGTTACTGCCCACGCTTTTATTATAATTTTTTTCATAGTTATACCAATCATAATTGGAGGATTTGGAAATTGATTAGTACCTTTAATATTAGGAGCTCCTGATATAGCATTTCCTCGAATAAACAATATAAGATTTTGACTTTTACCTCCTTCATTAACTTTATTATTAATAAGAAGAATAGTTGAAAACGGAGCAGGAACTGGATGAACAGTTTATCCTCCTTTATCTTCTAATATTGCTCATAGAGGATCTTCAGTAGATTTAGCAATTTTTAGATTACATTTAGCAGGAATTAGATCAATTTTAGGAGCTGTAAAT…
Ptomaphagus medius	AAU6931	BIOUG02856-D09	Canada	Ontario: Puslinch Township	2010-06-12	Paul Hebert	--	609 bp (Genbank: KR486723)	TTAAGACTTTTAATTCGAGCAGAATTAGGAAACCCGGGTAGATTAATTGGTGATGATCAAATTTATAATGTAATTGTTACTGCCCACGCTTTTATTATAATTTTTTTCATAGTTATACCAATCATAATTGGAGGATTTGGAAATTGATTAGTACCTTTAATATTAGGAGCTCCTGATATAGCATTTCCTCGAATAAACAATATAAGATTTTGACTTTTACCTCCTTCATTAACTTTATTATTAATAAGAAGAATAGTTGAAAACGGAGCAGGAACTGGATGAACAGTTTATCCTCCTTTATCTTCTAATATTGCTCATAGAGGATCTTCAGTAGATTTAGCAATTTTTAGATTACATTTAGCAGGAATTAGATCAATTTTAGGAGCTGTAAATTTTATT…
Ptomaphagus medius	AAU6931	BIOUG02856-E04	Canada	Ontario: Puslinch Township	2010-06-12	Paul Hebert	--	615 bp (Genbank: KR484771)	ACTTCTTTAAGACTTTTAATTCGAGCAGAATTAGGAAACCCGGGTAGATTAATTGGTGATGATCAAATTTATAATGTAATTGTTACTGCCCACGCTTTTATTATAATTTTTTTCATAGTTATACCAATCATAATTGGAGGATTTGGAAATTGATTAGTACCTTTAATATTAGGAGCTCCTGATATAGCATTTCCTCGAATAAACAATATAAGATTTTGACTTTTACCTCCTTCATTAACTTTATTATTAATAAGAAGAATAGTTGAAAACGGAGCAGGAACTGGATGAACAGTTTATCCTCCTTTATCTTCTAATATTGCTCATAGAGGATCTTCAGTAGATTTAGCAATTTTTAGATTACATTTAGCAGGAATTAGATCAATTTTAGGAGCTGTAAAT…
Ptomaphagus medius	AAU6931	BIOUG05624-C03	Canada	Ontario: Kitchener	2013-04-28	Kelli Neaven	--	591 bp (Genbank: KR486092)	ACCTTATACTTTATTTTTGGAGCATGAGCAGGAATAGTAGGTACTTCTTTAAGACTTTTAATTCGAGCAGAATTAGGAAACCCGGGTAGATTAATTGGTGATGATCAAATTTATAATGTAATTGTTACTGCCCACGCTTTTATTATAATTTTTTTCATAGTTATACCAATCATAATTGGAGGATTTGGAAATTGATTAGTACCTTTAATATTAGGAGCTCCTGATATAGCATTTCCTCGAATAAACAATATAAGATTTTGACTTTTACCTCCTTCATTAACTTTATTATTAATAAGAAGAATAGTTGAAAACGGAGCAGGAACTGGATGAACAGTTTATCCTCCTTTATCTTCTAATATTGCTCATAGAGGATCTTCAGTAGATTTAGCAATTTTTAGA…
Ptomaphagus medius	AAU6931	BIOUG08483-A03	Canada	Ontario: Rouge National Urban Park	2013-05-14	Lydia Attard, Kyla Greenham	Angela Telfer	595 bp (Genbank: KR126426)	ACTTTATTTTTGGAGCATGAGCAGGAATAGTAGGTACTTCTTTAAGACTTTTAATTCGAGCAGAATTAGGAAACCNGNGT------AGATTAATTGGTGATGATCAAATTTATAATGTAATTGTTACT------GCCCACGCTTTTATTATAATTTTTTTCATAGTTATACCAATCATAATTGGAGGATTTGGAAATTGATTAGTACCTTTAATATTAGGAGCTCCTGATATAGCATTTCCTCGAATAAACAATATAAGATTTTGACTTTTACCTCCTTCATTAACTTTATTATTAATAAGAAGAATAGTTGAAAACGGAGCAGGAACTGGATGAACAGTTTATCCTCCTTTATCTTCTAATATTGCTCATAGAGGATCTTCAGTAGATTTAGCAATTT…
Ptomaphagus medius	AAU6931	BIOUG08526-C04	Canada	Ontario: Rouge National Urban Park	2013-05-28	Lydia Attard, Kyla Greenham	Angela Telfer	533 bp (Genbank: KR122771)	GTA------GATTAATTGGTGATGATCAAATTTATAATGTAATTGTTACTGCCCACGCTTTTATTATAATTTTTTTCATAGTTATACCAATCATAATTGGAGGATTTGGAAATTGATTAGTACCTTTAATATTAGGAGCTCCTGATATAGCATTTCCTCGAATAAACAATATAAGATTTTGACTTTTACCTCCTTCATTAACTTTATTATTAATAAGAAGAATAGTTGAAAACGGAGCAGGAACTGGATGAACAGTTTATCCTCCTTTATCTTCTAATATTGCTCATAGAGGATCTTCAGTAGATTTAGCAATTTTTAGATTACATTTAGCAGGAATTAGATCAATTTTAGGAGCTGTAAATTTTATTACAACTGTAATCAATATACGTTCTCCAGGGA…
Ptomaphagus medius	AAU6931	BIOUG08642-E12	Canada	Ontario: Guelph	2013-10-04	M.Neerhof, S.Lipskie	--	558 bp (Genbank: KR489720)	ATTTTTGGAGCATGAGCAGGAATAGTAGGTACTTCTTTA---AGACTTTTAATTCGAGCAGAATTAGGAAACCNNNGTAGATTAATTGGTGAT---GATCAAATTTATAATGTAATTGTTACTGCCCACGCTTTTATTATAATTTTTTTCATAGTTATACCAATCATAATTGGAGGATTTGGAAATTGATTAGTACCTTTAATA---TTAGGAGCTCCTGATATAGCATTTCCTCGAATAAACAATATAAGATTTTGACTTTTACCTCCTTCATTAACTTTATTATTAATAAGAAGAATAGTTGAAAACGGAGCAGGAACTGGATGAACAGTTTATCCTCCTTTATCTTCTAATATTGCTCATAGAGGATCTTCAGTAGATTTA---GCAATTTTTAGA…
Ptomaphagus medius	AAU6931	BIOUG09006-F09	Canada	Ontario: Guelph	2013-07-11	BIO Collections Staff	Angela Telfer	580 bp (Genbank: KR489616)	CTTTATTTTTGGAGCATGAGCAGGAATAGTAGGTACTTCTTTAAGACTTTTAATTCGAGCAGAATTAGGAAACCCGGGTAGATTAATTGGTGATGATCAAATTTATAATGTAATTGTTACTGCCCACGCTTTTATTATAATTTTTTTCATAGTTATACCAATCATAATTGGAGGATTTGGAAATTGATTAGTACCTTTAATATTAGGAGCTCCTGATATAGCATTTCCTCGAATAAACAATATAAGATTTTGACTTTTACCTCCTTCATTAACTTTATTATTAATAAGAAGAATAGTTGAAAACGGAGCAGGAACTGGATGAACAGTTTATCCTCCTTTATCTTCTAATATTGCTCATAGAGGATCTTCAGTAGATTTAGCAATTTTTAGATTACATTT…
Ptomaphagus medius	AAU6931	BIOUG09006-G03	Canada	Ontario: Guelph	2013-07-11	BIO Collections Staff	Angela Telfer	589 bp (Genbank: KR481711)	GACCTTATACTTTATTTTTGGAGCATGAGCAGGAATAGTAGGTACTTCTTTAAGACTTTTAATTCGAGCAGAATTAGGAAACCCGGGTAGATTAATTGGTGATGATCAAATTTATAATGTAATTGTTACTGCCCACGCTTTTATTATAATTTTTTTCATAGTTATACCAATCATAATTGGAGGATTTGGAAATTGATTAGTACCTTTAATATTAGGAGCTCCTGATATAGCATTTCCTCGAATAAACAATATAAGATTTTGACTTTTACCTCCTTCATTAACTTTATTATTAATAAGAAGAATAGTTGAAAACGGAGCAGGAACTGGATGAACAGTTTATCCTCCTTTATCTTCTAATATTGCTCATAGAGGATCTTCAGTAGATTTAGCAATTTTTAG…
Ptomaphagus medius	AAU6931	BIOUG09008-E07	Canada	Ontario: Guelph	2013-07-11	BIO Collections Staff	Angela Telfer	590 bp (Genbank: KR483152)	GGACCTTATACTTTATTTTTGGAGCATGAGCAGGAATAGTAGGTACTTCTTTAAGACTTTTAATTCGAGCAGAATTAGGAAACCCGGGTAGATTAATTGGTGATGATCAAATTTATAATGTAATTGTTACTGCCCACGCTTTTATTATAATTTTTTTCATAGTTATACCAATCATAATTGGAGGATTTGGAAATTGATTAGTACCTTTAATATTAGGAGCTCCTGATATAGCATTTCCTCGAATAAACAATATAAGATTTTGACTTTTACCTCCTTCATTAACTTTATTATTAATAAGAAGAATAGTTGAAAACGGAGCAGGAACTGGATGAACAGTTTATCCTCCTTTATCTTCTAATATTGCTCATAGAGGATCTTCAGTAGATTTAGCAATTTTTA…
Ptomaphagus medius	AAU6931	BIOUG09008-H06	Canada	Ontario: Guelph	2013-07-11	BIO Collections Staff	Angela Telfer	590 bp (Genbank: KR490984)	GGACCTTATACTTTATTTTTGGAGCATGAGCAGGAATAGTAGGTACTTCTTTAAGACTTTTAATTCGAGCAGAATTAGGAAACCCGGGTAGATTAATTGGTGATGATCAAATTTATAATGTAATTGTTACTGCCCACGCTTTTATTATAATTTTTTTCATAGTTATACCAATCATAATTGGAGGATTTGGAAATTGATTAGTACCTTTAATATTAGGAGCTCCTGATATAGCATTTCCTCGAATAAACAATATAAGATTTTGACTTTTACCTCCTTCATTAACTTTATTATTAATAAGAAGAATAGTTGAAAACGGAGCAGGAACTGGATGAACAGTTTATCCTCCTTTATCTTCTAATATTGCTCATAGAGGATCTTCAGTAGATTTAGCAATTTTTA…
Ptomaphagus medius	AAU6931	BIOUG09244-C04	Canada	Ontario: Rouge National Urban Park	2013-06-18	Lydia Attard, Kyla Greenham	Angela Telfer	579 bp (Genbank: KR121504)	ACCTTATACTTTATTTTTGGAGCATGAGCAGGAATAGTAGGTACTTCTTTAAGACTTTTAATTCGAGCAGAATTAGGAAANCNNNGTAGATTAATTGGTGAT---GATCAAATTTATAATGTAATTGTTACTGCCCACGCTTTTATTATAATTTTTTTCATAGTTATACCAATCATAATTGGAGGATTTGGAAATTGATTAGTACCTTTAATATTAGGAGCTCCTGATATAGCATTTCCTCGAATAAACAATATAAGATTTTGACTTTTACCTCCTTCATTAACTTTATTATTAATAAGAAGAATAGTTGAAAACGGAGCAGGAACTGGATGAACAGTTTATCCTCCTTTATCTTCTAATATTGCTCATAGAGGATCTTCAGTAGATTTAGCAATTTTT…
Ptomaphagus medius	AAU6931	BIOUG09348-E03	Canada	Ontario: Guelph	2013-08-08	BIO Collections Staff	Angela Telfer	603 bp (Genbank: KR486444)	ACCTTATACTTTATTTTTGGAGCATGAGCAGGAATAGTAGGTACTTCTTTA---AGACTTTTAATTCGAGCAGAATTAGGAAACCNNNGTAGATTAATTGGTGAT---GATCAAATTTATAATGTAATTGTTACTGCCCACGCTTTTATTATAATTTTTTTCATAGTTATACCAATCATAATTGGAGGATTTGGAAATTGATTAGTACCTTTAATA---TTAGGAGCTCCTGATATAGCATTTCCTCGAATAAACAATATAAGATTTTGACTTTTACCTCCTTCATTAACTTTATTATTAATAAGAAGAATAGTTGAAAACGGAGCAGGAACTGGATGAACAGTTTATCCTCCTTTATCTTCTAATATTGCTCATAGAGGATCTTCAGTAGATTTA---…
Ptomaphagus medius	AAU6931	BIOUG09351-A01	Canada	Ontario: Guelph	2013-08-08	BIO Collections Staff	Angela Telfer	638 bp (Genbank: KR489857)	GACCTTATACTTTATTTTTGGAGCATGAGCAGGAATAGTAGGTACTTCTTTAAGACTTTTAATTCGAGCAGAATTAGGAAACCNGGGTAGATTAATTGGTGAT------GATCAAATTTATAATGTAATTGTTACTGCCCACGCTTTTATTATAATTTTTTTCATAGTTATACCAATCATAATTGGAGGATTTGGAAATTGATTAGTACCTTTAATATTAGGAGCTCCTGATATAGCATTTCCTCGAATAAACAATATAAGATTTTGACTTTTACCTCCTTCATTAACTTTATTATTAATAAGAAGAATAGTTGAAAACGGAGCAGGAACTGGATGAACAGTTTATCCTCCTTTATCTTCTAATATTGCTCATAGAGGATCTTCAGTAGATTTAGCAAT…
Ptomaphagus medius	AAU6931	BIOUG09511-F07	Canada	Ontario: Guelph	2013-08-22	BIO Collections Staff	Angela Telfer	604 bp (Genbank: KR488004)	GACCTTATACTTTATTTTTGGAGCATGAGCAGGAATAGTAGGTACTTCTTTAAGACTTTTAATTCGAGCAGAATTAGGAAACCCGGGTAGA---------TTAATTGGTGATGATCAAATTTATAATGTAATTGTTACTGCCCACGCTTTTATTATAATTTTTTTCATAGTTATACCAATCATAATTGGAGGATTTGGAAATTGATTAGTACCTTTAATATTAGGAGCTCCTGATATAGCATTTCCTCGAATAAACAATATAAGATTTTGACTTTTACCTCCTTCATTAACTTTATTATTAATAAGAAGAATAGTTGAAAACGGAGCAGGAACTGGATGAACAGTTTATCCTCCTTTATCTTCTAATATTGCTCATAGAGGATCTTCAGTAGATTTAGC…
Ptomaphagus medius	AAU6931	BIOUG12667-E05	Canada	Ontario: Rouge National Urban Park	2013-06-09	BIObus 2013	--	588 bp (Genbank: KR481714)	ACCTTATACTTTATTTTTGGAGCATGAGCAGGAATAGTAGGTACTTCTTTAAGACTTTTAATTCGAGCAGAATTAGGAAANCNNNGTAGATTAATTGGTGATGATCAAATTTATAATGTAATTGTTACTGCCCACGCTTTTATTATAATTTTTTTCATAGTTATACCAATCATAATTGGAGGATTTGGAAATTGATTAGTACCTTTAATATTAGGAGCTCCTGATATAGCATTTCCTCGAATAAACAATATAAGATTTTGACTTTTACCTCCTTCATTAACTTTATTATTAATAAGAAGAATAGTTGAAAACGGAGCAGGAACTGGATGAACAGTTTATCCTCCTTTATCTTCTAATATTGCTCATAGAGGATCTTCAGTAGATTTAGCAATTTTTAGA…
Ptomaphagus medius	AAU6931	BIOUG16074-C09	Canada	Ontario: Cambridge	2014-10-03	Grace Mchaina	--	567 bp (Genbank: KR482674)	TTTATTTTTGGAGCATGAGCAGGAATAGTAGGTACTTCTTTAAGACTTTTAATTCGAGCAGAATTAGGAAACCNGNGTAGATTAATTGGTGATGATCAAATTTATAATGTAATTGTTACTGCCCACGCTTTTATTATAATTTTTTTCATAGTTATACCAATCATAATTGGAGGATTTGGAAATTGATTAGTACCTTTAATATTAGGAGCTCCTGATATAGCATTTCCTCGAATAAACAATATAAGATTTTGACTTTTACCTCCTTCATTAACTTTATTATTAATAAGAAGAATAGTTGAAAACGGAGCAGGAACTGGATGAACAGTTTATCCTCCTTTATCTTCTAATATTGCTCATAGAGGATCTTCAGTAGATTTAGCAATTTTTAGATTACATTTA…
Ptomaphagus medius	AAU6931	BIOUG16074-D03	Canada	Ontario: Cambridge	2014-10-03	Grace Mchaina	--	564 bp (Genbank: KR490583)	ACCTTATACTTTATTTTTGGAGCATGAGCAGGAATAGTAGGTACTTCTTTAAGACTTTTAATTCGAGCAGAATTAGGAAACCCGGGTAGATTAATTGGTGATGATCAAATTTATAATGTAATTGTTACTGCCCACGCTTTTATTATAATTTTTTTCATAGTTATACCAATCATAATTGGAGGATTTGGAAATTGATTAGTACCTTTAATATTAGGAGCTCCTGATATAGCATTTCCTCGAATAAACAATATAAGATTTTGACTTTTACCTCCTTCATTAACTTTATTATTAATAAGAAGAATAGTTGAAAACGGAGCAGGAACTGGATGAACAGTTTATCCTCCTTTATCTTCTAATATTGCTCATAGAGGATCTTCAGTAGATTTAGCAATTTTTAGA…
Ptomaphagus medius	AAU6931	BIOUG16074-D12	Canada	Ontario: Cambridge	2014-10-03	Grace Mchaina	--	520 bp (Genbank: KR481798)	GTAGATTAATTGGTGATGATCAAATTTATAATGTAATTGTTACTGCCCACGCTTTTATTATAATTTTTTTCATAGTTATACCAATCATAATTGGAGGATTTGGAAATTGATTAGTACCTTTAATATTAGGAGCTCCTGATATAGCATTTCCTCGAATAAACAATATAAGATTTTGACTTTTACCTCCTTCATTAACTTTATTATTAATAAGAAGAATAGTTGAAAACGGAGCAGGAACTGGATGAACAGTTTATCCTCCTTTATCTTCTAATATTGCTCATAGAGGATCTTCAGTAGATTTAGCAATTTTTAGATTACATTTAGCAGGAATTAGATCAATTTTAGGAGCTGTAAATTTTATTACAACTGTAATCAATATACGTTCTCCAGGGATAACTT…
Ptomaphagus medius	AAU6931	BIOUG16074-E01	Canada	Ontario: Cambridge	2014-10-03	Grace Mchaina	--	585 bp (Genbank: KR487304)	AGCATGAGCAGGAATAGTAGGTACTTCTTTAAGACTTTTAATTCGAGCAGAATTAGGAAACCNGGGTAGATTAATTGGTGATGATCAAATTTATAATGTAATTGTTACTGCCCACGCTTTTATTATAATTTTTTTCATAGTTATACCAATCATAATTGGAGGATTTGGAAATTGATTAGTACCTTTAATATTAGGAGCTCCTGATATAGCATTTCCTCGAATAAACAATATAAGATTTTGACTTTTACCTCCTTCATTAACTTTATTATTAATAAGAAGAATAGTTGAAAACGGAGCAGGAACTGGATGAACAGTTTATCCTCCTTTATCTTCTAATATTGCTCATAGAGGATCTTCAGTAGATTTAGCAATTTTTAGATTACATTTAGCAGGAATTAG…
Ptomaphagus medius	AAU6931	BIOUG16074-E02	Canada	Ontario: Cambridge	2014-10-03	Grace Mchaina	--	574 bp (Genbank: KR482058)	GACCTTATACTTTATTTTTGGAGCATGAGCAGGAATAGTAGGTACTTCTTTAAGACTTTTAATTCGAGCAGAATTAGGAAANNGTAGATTAATTGGTGATGATCAAATTTATAATGTAATTGTTACTGCCCACGCTTTTATTATAATTTTTTTCATAGTTATACCAATCATAATTGGAGGATTTGGAAATTGATTAGTACCTTTAATATTAGGAGCTCCTGATATAGCATTTCCTCGAATAAACAATATAAGATTTTGACTTTTACCTCCTTCATTAACTTTATTATTAATAAGAAGAATAGTTGAAAACGGAGCAGGAACTGGATGAACAGTTTATCCTCCTTTATCTTCTAATATTGCTCATAGAGGATCTTCAGTAGATTTAGCAATTTTTAGATT…
Ptomaphagus medius	AAU6931	BIOUG16134-E09	Canada	Ontario: Peterborough	2014-10-03	Rose Wornoff	--	611 bp (Genbank: KR480451)	GACCTTATACTTTATTTTTGGAGCATGAGCAGGAATAGTAGGTACTTCTTTAAGACTTTTAATTCGAGCAGAATTAGGAAACCNGGGTAGATTAATTGGTGATGATCAAATTTATAATGTAATTGTTACTGCCCACGCTTTTATTATAATTTTTTTCATAGTTATACCAATCATAATTGGAGGATTTGGAAATTGATTAGTACCTTTAATATTAGGAGCTCCTGATATAGCATTTCCTCGAATAAACAATATAAGATTTTGACTTTTACCTCCTTCATTAACTTTATTATTAATAAGAAGAATAGTTGAAAACGGAGCAGGAACTGGATGAACAGTTTATCCTCCTTTATCTTCTAATATTGCTCATAGAGGATCTTCAGTAGATTTAGCAATTTTTAG…
Ptomaphagus medius	AAU6931	BIOUG21914-G02	Canada	Ontario: Chesterville	2015-05-08	Michelle Gibbs	--	579 bp (BOLD: SMTPL2307-15.COI-5P)	TTTATTTTTGGAGCATGAGCAGGAATAGTAGGTACTTCTTTAAGACTTTTAATTCGAGCAGAATTAGGAAACCCGGGTAGATTAATTGGTGATGATCAAATTTATAATGTAATTGTTACTGCCCACGCTTTTATTATAATTTTTTTCATAGTTATACCAATCATAATTGGAGGATTTGGAAATTGATTAGTACCTTTAATATTAGGAGCTCCTGATATAGCATTTCCTCGAATAAACAATATAAGATTTTGACTTTTACCTCCTTCATTAACTTTATTATTAATAAGAAGAATAGTTGAAAACGGAGCAGGAACTGGATGAACAGTTTATCCTCCTTTATCTTCTAATATTGCTCATAGAGGATCTTCAGTAGATTTAGCAATTTTTAGATTACATTTA…
Ptomaphagus medius	AAU6931	BIOUG21916-B04	Canada	Ontario: Scarborough	2015-05-08	John Winfield	--	555 bp (BOLD: SMTPL1804-15.COI-5P)	ACCTTATACTTTATTTTTGGAGCATGAGCAGGAATAGTAGGTACTTCTTTAAGACTTTTAATTCGAGCAGAATTAGGAANNNGTAGANTAATTGGTGATGATCAAATTTATAATGTAATTGTTACTGCCCACGCTTTTATTATAATTTTTTTCATAGTTATACCAATCATAATTGGAGGATTTGGAAATTGATTAGTACCTTTAATATTAGGAGCTCCTGATATAGCATTTCCTCGAATAAACAATATAAGATTTTGACTTTTACCTCCTTCATTAACTTTATTATTAATAAGAAGAATAGTTGAAAACGGAGCAGGAACTGGATGAACAGTTTATCCTCCTTTATCTTCTAATATTGCTCATAGAGGATCTTCAGTAGATTTAGCAATTTTTAGATTA…
Ptomaphagus medius	AAU6931	BIOUG21939-F07	Canada	Ontario: Toronto	2015-05-08	Nicole Anthony	--	568 bp (BOLD: SMTPL3490-15.COI-5P)	GACCTTATACTTTATTTTTGGAGCATGAGCAGGAATAGTAGGTACTTCTTTAAGACTTTTAATTCGAGCAGAATTAGGAAACCNGGGTAGATTAATTGGTGATGATCAAATTTATAATGTAATTGTTACTGCCCACGCTTTTATTATAATTTTTTTCATAGTTATACCAATCATAATTGGAGGATTTGGAAATTGATTAGTACCTTTAATATTAGGAGCTCCTGATATAGCATTTCCTCGAATAAACAATATAAGATTTTGACTTTTACCTCCTTCATTAACTTTATTATTAATAAGAAGAATAGTTGAAAACGGAGCAGGAACTGGATGAACAGTTTATCCTCCTTTATCTTCTAATATTGCTCATAGAGGATCTTCAGTAGATTTAGCAATTTTTAG…
Ptomaphagus medius	AAU6931	BIOUG21951-G01	Canada	Ontario: Toronto	2015-05-08	Kevin D'Souza	--	546 bp (BOLD: SMTPL4529-15.COI-5P)	TTATACTTTATTTTTGGAGCATGAGCAGGAATAGTAGGTACTTCTTTAAGACTTTTAATTCGAGCAGAATTAGGAAACCCGGGTAGATTAATTGGTGATGATCAAATTTATAATGTAATTGTTACTGCCCACGCTTTTATTATAATTTTTTTCATAGTTATACCAATCATAATTGGAGGATTTGGAAATTGATTAGTACCTTTAATATTAGGAGCTCCTGATATAGCATTTCCTCGAATAAACAATATAAGATTTTGACTTTTACCTCCTTCATTAACTTTATTATTAATAAGAAGAATAGTTGAAAACGGAGCAGGAACTGGATGAACAGTTTATCCTCCTTTATCTTCTAATATTGCTCATAGAGGATCTTCAGTAGATTTAGCAATTTTTAGATTA…
Ptomaphagus medius	AAU6931	BIOUG31027-G06	Canada	Ontario: Ancaster	2016-09-30	Kim Oppertshauser	--	579 bp (BOLD: SMTPR2822-16.COI-5P)	TTTATTTTTGGAGCATGAGCAGGAATAGTAGGTACTTCTTTAAGACTTTTAATTCGAGCAGAATTAGGAAACCCGGGTAGATTAATTGGTGATGATCAAATTTATAATGTAATTGTTACTGCCCACGCTTTTATTATAATTTTTTTCATAGTTATACCAATCATAATTGGAGGATTTGGAAATTGATTAGTACCTTTAATATTAGGAGCTCCTGATATAGCATTTCCTCGAATAAACAATATAAGATTTTGACTTTTACCTCCTTCATTAACTTTATTATTAATAAGAAGAATAGTTGAAAACGGAGCAGGAACTGGATGAACAGTTTATCCTCCTTTATCTTCTAATATTGCTCATAGAGGATCTTCAGTAGATTTAGCAATTTTTAGATTACATTTA…
Ptomaphagus medius	AAU6931	GBOL_Col_FK_8581	Germany	Saxony: Wolkenstein-Hilmersdorf, An der Heinzebank	2013-01-06	Weidlich, R.	Frank Koehler	658 bp (Genbank: KM446148)	GACCTTATACTTTATTTTTGGAGCATGAGCAGGAATAGTAGGTACTTCTTTAAGACTTTTAATTCGAGCAGAATTAGGAAACCCGGGTAGATTAATTGGTGATGATCAAATTTATAATGTAATTGTTACTGCCCACGCTTTTATTATAATTTTTTTCATAGTTATACCAATCATAATTGGAGGATTTGGAAATTGATTAGTACCTTTAATATTAGGAGCTCCTGATATAGCATTTCCTCGAATAAACAATATAAGATTTTGACTTTTACCTCCTTCATTAACTTTATTATTAATAAGAAGAATAGTTGAAAACGGAGCAGGAACTGGATGAACAGTTTATCCTCCTCTATCTTCTAATATTGCTCATAGAGGATCTTCAGTAGATTTAGCAATTTTTAG…
Ptomaphagus medius	AAU6931	RMNH.INS.549254	The Netherlands	Zuid-Holland: Oegstgeest	2011-03-01	Devi van der Horst	Menno Schilthuizen	439 bp (BOLD: CHOLH032-12)	TCGAATAAACAATATAAGATTTTGACTTTTACCTCCTTCATTAACTTTATTATTAATAAGAAGAATAGTTGAAAACGGAGCAGGAACTGGATGAACAGTTTATCCTCCTCTATCTTCTAATATTGCTCATAGAGGATCTTCAGTAGATTTAGCAATTTTTAGATTACATTTAGCAGGAATTAGATCAATTTTAGGAGCTGTAAATTTTATTACAACTGTAATCAATATACGTTCTCCAGGAATAACTTTAGATAAAATACCTTTATTTGTATGATCTGTAGCTATTACTGCTTTATTATTACTTTTATCTTTACCAGTTTTAGCAGGAGCAATTACAATATTATTAACAGATCGAAATTTAAATACTTCTTTTTTTGATCCTGCAGGAGGAGGAGACCC…
Ptomaphagus subvillosus		RMNH.INS.549287	The Netherlands	Zuid-Holland: Oegstgeest	2011-03-01	Devi van der Horst	Menno Schilthuizen	439 bp (BOLD: CHOLH065-12)	TCGAATAAATAATATAAGATTTTGACTTTTACCCCCTTCATTAACATTACTTTTAATAAGAAGAATAGTTGAAAATGGAGCAGGAACTGGTTGGACAGTTTACCCCCCACTATCTTCCAATATTGCTCATAGAGGATCCTCTGTAGATCTTGCAATTTTTAGTTTACATTTAGCAGGAATTTCCTCAATTTTAGGAGCCGTAAATTTTATTACTACAGTAATTAATATACGTTCTCCAGGAATAACATTAGATAAAATACCATTATTTGTTTGATCAGTAGTTATTACTGCTTTACTTTTACTTTTATCTCTCCCAGTATTAGCAGGAGCAATTACAATATTATTAACTGACCGAAATTTAAATACTTCTTTTTTTGACCCAGCAGGGGGAGGAGACCC…
Ptomaphagus subvillosus		RMNH.INS.549288	The Netherlands	Zuid-Holland: Oegstgeest	2011-03-01	Devi van der Horst	Menno Schilthuizen	439 bp (Genbank: KF492835)	TCGAATAAATAATATAAGATTTTGATTTTTACCTCCTTCATTAACATTACTTTTAATAAGAAGAATAGTTGAAAATGGAGCAGGAACTGGTTGGACAGTTTACCCCCCACTATCTTCCAATATTGCTCATAGAGGATCCTCTGTAGATCTTGCAATTTTTAGTTTACATTTAGCAGGAATTTCCTCAATTTTAGGAGCCGTAAATTTTATTACTACAGTAATTAATATACGTTCTCCAGGAATAACATTAGATAAAATACCATTATTTGTTTGATCAGTAGTTATTACTGCTTTACTTTTACTTTTATCTCTCCCAGTATTAGCAGGAGCAATTACAATATTATTAACTGACCGAAATTTAAATACTTCTTTTTTTGACCCAGCAGGGGGAGGAGACCC…
Ptomaphagus thebeatles		RMNH.INS.549289	The Netherlands	Zuid-Holland: Oegstgeest	2011-03-01	Devi van der Horst	Menno Schilthuizen	439 bp (BOLD: CHOLH067-12)	TCGAATAAATAATATAAGATTTTGACTTTTACCACCTTCATTAACTTTATTATTAATGAGAAGAATAGTAGAAAATGGAGCAGGAACTGGATGAACAGTTTATCCTCCTCTTTCTTCTAATATTGCTCATAGAGGATCTTCAGTAGATTTAGCAATTTTTAGATTACATTTAACAGGAATTTCATCAATTTTAGGAGCTGTTAATTTTATTACAACTGTAATTAATATACGTTCTCCAGGAATAACTTTAGATAAAATACCTTTATTTGTTTGATCTGTAGCTATTACTGCTTTATTACTACTTTTATCTTTACCAGTATTAGCAGGAGCTATTACTATATTATTAACAGATCGAAATTTAAATACTTCTTTTTTTGATCCTGCAGGAGGAGGAGATCC…
Ptomaphagus thebeatles		RMNH.INS.549290	The Netherlands	Zuid-Holland: Oegstgeest	2011-03-01	Devi van der Horst	Menno Schilthuizen	439 bp (BOLD: CHOLH068-12)	TCGAATAAATAATATAAGATTTTGACTTTTACCACCTTCATTAACTTTATTATTAATGAGAAGAATAGTAGAAAATGGAGCAGGAACTGGATGAACAGTTTATCCTCCTCTTTCTTCTAATATTGCTCATAGAGGATCTTCAGTAGATTTAGCAATTTTTAGATTACATTTAGCAGGAATTTCATCAATTTTAGGAGCTGTTAATTTTATTACAACTGTAATTAATATACGTTCTCCAGGAATAACTTTAGATAAAATACCTTTATTTGTTTGATCTGTAGCTATTACTGCTTTATTACTACTTTTATCTTTACCAGTATTAGCAGGAGCTATTACTATATTATTAACAGATCGAAATTTAAATACTTCTTTTTTTGATCCTGCAGGAGGAGGAGATCC…
Ptomaphagus thebeatles		RMNH.INS.549291	The Netherlands	Zuid-Holland: Oegstgeest	2011-03-01	Devi van der Horst	Menno Schilthuizen	439 bp (BOLD: CHOLH069-12)	TCGAATAAATAATATAAGATTTTGACTTTTACCACCTTCATTAACTTTATTATTAATGAGAAGAATAGTAGAAAATGGAGCAGGAACTGGATGAACAGTTTATCCTCCTCTTTCTTCTAATATTGCTCATAGAGGATCTTCAGTAGATTTAGCAATTTTTAGATTACATTTAGCAGGAATTTCATCAATTTTAGGAGCTGTTAATTTTATTACAACTGTAATTAATATACGTTCTCCAGGAATAACTTTAGATAAAATACCTTTATTTGTTTGATCTGTAGCTATTACTGCTTTATTACTACTTTTATCTTTACCAGTATTAGCAGGAGCTATTACTATATTATTAACAGATCGAAATTTAAATACTTCTTTTTTTGATCCTGCAGGAGGAGGAGATCC…
Ptomaphagus medius	AAU6931	RMNH.INS.549292	The Netherlands	Zuid-Holland: Oegstgeest	2011-03-01	Devi van der Horst	Menno Schilthuizen	439 bp (BOLD: CHOLH070-12)	TCGAATAAACAATATAAGATTTTGACTTTTACCTCCTTCATTAACTTTATTATTAATAAGAAGAATAGTTGAAAACGGAGCAGGAACTGGATGAACAGTTTATCCTCCTCTATCTTCTAATATTGCTCATAGAGGATCTTCAGTAGATTTAGCAATTTTTAGATTACATTTAGCAGGAATTAGATCAATTTTAGGAGCTGTAAATTTTATTACAACTGTAATCAATATACGTTCTCCAGGAATAACTTTAGATAAAATACCTTTATTTGTATGATCTGTAGCTATTACTGCTTTATTATTACTTTTATCTTTACCAGTTTTAGCAGGAGCAATTACAATATTATTAACAGATCGAAATTTAAATACTTCTTTTTTTGATCCTGCAGGAGGAGGAGACCC…
Ptomaphagus thebeatles		RMNH.INS.549307	The Netherlands	Zuid-Holland: Oegstgeest	2011-03-01	Devi van der Horst	Menno Schilthuizen	439 bp (BOLD: CHOLH085-12)	TCGAATAAATAATATAAGATTTTGACTTTTACCACCTTCATTAACTTTATTATTAATGAGAAGAATAGTAGAAAATGGAGCAGGAACTGGATGAACAGTTTATCCTCCTCTTTCTTCTAATATTGCTCATAGAGGATCTTCAGTAGATTTAGCAATTTTTAGATTACATTTAGCAGGAATTTCATCAATTTTAGGAGCTGTTAATTTTATTACAACTGTAATTAATATACGTTCTCCAGGAATAACTTTAGATAAAATACCTTTATTTGTTTGATCTGTAGCTATTACTGCTTTATTACTACTTTTATCTTTACCAGTATTAGCAGGAGCTATTACTATATTATTAACAGATCGAAATTTAAATACTTCTTTTTTTGATCCTGCAGGAGGAGGAGATCC…
Ptomaphagus thebeatles		RMNH.INS.549308	The Netherlands	Zuid-Holland: Oegstgeest	2011-03-01	Devi van der Horst	Menno Schilthuizen	439 bp (BOLD: CHOLH086-12)	TCGAATAAATAATATAAGATTTTGACTTTTACCACCTTCATTAACTTTATTATTAATGAGAAGAATAGTAGAAAATGGAGCAGGAACTGGATGAACAGTTTATCCTCCTCTTTCTTCTAATATTGCTCATAGAGGATCTTCAGTAGATTTAGCAATTTTTAGATTACATTTAGCAGGAATTTCATCAATTTTAGGAGCTGTTAATTTTATTACAACTGTAATTAATATACGTTCTCCAGGAATAACTTTAGATAAAATACCTTTATTTGTTTGATCTGTAGCTATTACTGCTTTATTACTACTTTTATCTTTACCAGTATTAGCAGGAGCTATTACTATATTATTAACAGATCGAAATTTAAATACTTCTTTTTTTGATCCTGCAGGAGGAGGAGATCC…
Ptomaphagus medius	AAU6931	RMNH.INS.549309	The Netherlands	Zuid-Holland: Oegstgeest	2011-03-01	Devi van der Horst	Menno Schilthuizen	439 bp (BOLD: CHOLH087-12)	TCGAATAAACAATATAAGATTTTGACTTTTACCTCCTTCATTAACTTTATTATTAATAAGAAGAATAGTTGAAAACGGAGCAGGAACTGGATGAACAGTTTATCCTCCTCTATCTTCTAATATTGCTCATAGAGGATCTTCAGTAGATTTAGCAATTTTTAGATTACATTTAGCAGGAATTAGATCAATTTTAGGAGCTGTAAATTTTATTACAACTGTAATCAATATACGTTCTCCAGGAATAACTTTAGATAAAATACCTTTATTTGTATGATCTGTAGCTATTACTGCTTTATTATTACTTTTATCTTTACCAGTTTTAGCAGGAGCAATTACAATATTATTAACAGATCGAAATTTAAATACTTCTTTTTTTGATCCTGCAGGAGGAGGAGACCC…
Ptomaphagus medius	AAU6931	RMNH.INS.549310	The Netherlands	Zuid-Holland: Oegstgeest	2011-03-01	Devi van der Horst	Menno Schilthuizen	439 bp (BOLD: CHOLH088-12)	TCGAATAAACAATATAAGATTTTGACTTTTACCTCCTTCATTAACTTTATTATTAATAAGAAGAATAGTTGAAAACGGAGCAGGAACTGGATGAACAGTTTATCCTCCTCTATCTTCTAATATTGCTCATAGAGGATCTTCAGTAGATTTAGCAATTTTTAGATTACATTTAGCAGGAATTAGATCAATTTTAGGAGCTGTAAATTTTATTACAACTGTAATCAATATACGTTCTCCAGGAATAACTTTAGATAAAATACCTTTATTTGTATGATCTGTAGCTATTACTGCTTTATTATTACTTTTATCTTTACCAGTTTTAGCAGGAGCAATTACAATATTATTAACAGATCGAAATTTAAATACTTCTTTTTTTGATCCTGCAGGAGGAGGAGACCC…
Ptomaphagus pius	ABX3052	RMNH.INS.550303	Italy	Lazio: Villa Ada	2012-03-19	R. van Beek, T. Hoogenboom & P. de Jong	Menno Schilthuizen	658 bp (BOLD: CHOLH131-12)	CACCTTATATTTTATTTTTGGTGCATGAGCAGGAATAGTAGGGACTTCGTTAAGACTTTTAATTCGAGCAGAATTAGGGAACCCGGGAAGATTAATTGGAGATGATCAAATTTATAATGTAATTGTTACTGCCCATGCTTTCATTATAATTTTTTTTATAGTTATGCCTATTATAATTGGAGGATTTGGAAATTGATTAGTTCCTTTAATACTAGGAGCTCCTGATATAGCTTTTCCTCGAATAAATAATATAAGATTTTGACTTTTACCTCCTTCTTTAACTTTACTTTTAATAAGAAGAATAGTTGAAAATGGAGCAGGAACTGGATGAACAGTATACCCTCCTTTATCTTCTAATATTGCTCACAGAGGATCTTCAGTAGATCTTGCAATTTTTAG…
Ptomaphagus pius	ABX3052	RMNH.INS.550304	Italy	Lazio: Villa Ada	2012-03-19	R. van Beek, T. Hoogenboom & P. de Jong	Menno Schilthuizen	658 bp (BOLD: CHOLH132-12)	CACCTTATATTTTATTTTTGGTGCATGAGCAGGAATAGTAGGGACTTCGTTAAGACTTTTAATTCGAGCAGAATTAGGGAACCCGGGAAGATTAATTGGAGATGATCAAATTTATAATGTAATTGTTACTGCCCATGCTTTCATTATAATTTTTTTTATAGTTATGCCTATTATAATTGGAGGATTTGGAAATTGATTAGTTCCTTTAATACTAGGAGCTCCTGATATAGCTTTTCCTCGAATAAATAATATAAGATTTTGACTTTTACCTCCTTCTTTAACTTTACTTTTAATAAGAAGAATAGTTGAAAATGGAGCAGGAACTGGATGAACAGTATACCCTCCTTTATCTTCTAATATTGCTCACAGAGGATCTTCAGTAGATCTTGCAATTTTTAG…
Ptomaphagus pius	ABX3052	RMNH.INS.550305	Italy	Lazio: Villa Ada	2012-03-19	R. van Beek, T. Hoogenboom & P. de Jong	Menno Schilthuizen	658 bp (BOLD: CHOLH133-12)	CACCTTATATTTTATTTTTGGTGCATGAGCAGGAATAGTAGGGACTTCGTTAAGACTTTTAATTCGAGCAGAATTAGGGAACCCGGGAAGATTAATTGGAGATGATCAAATTTATAATGTAATTGTTACTGCCCATGCTTTCATTATAATTTTTTTTATAGTTATGCCTATTATAATTGGAGGATTTGGAAATTGATTAGTTCCTTTAATACTAGGAGCTCCTGATATAGCTTTTCCTCGAATAAATAATATAAGATTTTGACTTTTACCTCCTTCTTTAACTTTACTTTTAATAAGAAGAATAGTTGAAAATGGAGCAGGAACTGGATGAACAGTATACCCTCCTTTATCTTCTAATATTGCTCACAGAGGATCTTCAGTAGATCTTGCAATTTTTAG…
Ptomaphagus pius	ABX3052	RMNH.INS.550306	Italy	Lazio: Villa Ada	2012-03-19	R. van Beek, T. Hoogenboom & P. de Jong	Menno Schilthuizen	658 bp (BOLD: CHOLH134-12)	CACCTTATATTTTATTTTTGGTGCATGAGCAGGAATAGTAGGGACTTCGTTAAGACTTTTAATTCGAGCAGAATTAGGGAACCCGGGAAGATTAATTGGAGATGATCAAATTTATAATGTAATTGTTACTGCCCATGCTTTCATTATAATTTTTTTTATAGTTATGCCTATTATAATTGGAGGATTTGGAAATTGATTAGTTCCTTTAATACTAGGAGCTCCTGATATAGCTTTTCCTCGAATAAATAATATAAGATTTTGACTTTTACCTCCTTCTTTAACTTTACTTTTAATAAGAAGAATAGTTGAAAATGGAGCAGGAACTGGATGAACAGTATACCCTCCTTTATCTTCTAATATTGCTCACAGAGGATCTTCAGTAGATCTTGCAATTTTTAG…
Ptomaphagus pius	ABX3052	RMNH.INS.550307	Italy	Lazio: Villa Ada	2012-03-19	R. van Beek, T. Hoogenboom & P. de Jong	Menno Schilthuizen	658 bp (BOLD: CHOLH135-12)	CACCTTATATTTTATTTTTGGTGCATGAGCAGGAATAGTAGGGACTTCGTTAAGACTTTTAATTCGAGCAGAATTAGGGAACCCGGGAAGATTAATTGGAGATGATCAAATTTATAATGTAATTGTTACTGCCCATGCTTTCATTATAATTTTTTTTATAGTTATGCCTATTATAATTGGAGGATTTGGAAATTGATTAGTTCCTTTAATACTAGGAGCTCCTGATATAGCTTTTCCTCGAATAAATAATATAAGATTTTGACTTTTACCTCCTTCTTTAACTTTACTTTTAATAAGAAGAATAGTTGAAAATGGAGCAGGAACTGGATGAACAGTATACCCTCCTTTATCTTCTAATATTGCTCACAGAGGATCTTCAGTAGATCTTGCAATTTTTAG…
Ptomaphagus pius	ABX3052	RMNH.INS.550309	Italy	Lazio: Villa Ada	2012-03-19	R. van Beek, T. Hoogenboom & P. de Jong	Menno Schilthuizen	658 bp (BOLD: CHOLH137-12)	CACCTTATATTTTATTTTTGGTGCATGAGCAGGAATAGTAGGGACTTCGTTAAGACTTTTAATTCGAGCAGAATTAGGAAACCCAGGAAGATTAATTGGAGATGATCAAATTTATAATGTAATTGTTACTGCCCATGCTTTCATTATAATTTTTTTTATAGTTATACCTATTATAATTGGAGGATTTGGAAATTGATTAGTTCCTTTAATACTAGGAGCTCCTGATATAGCTTTTCCTCGAATAAATAATATAAGATTTTGACTTTTACCTCCTTCTTTAACTTTACTTTTAATAAGAAGAATAGTTGAAAATGGAGCAGGAACTGGATGAACAGTATACCCTCCTTTATCTTCTAATATTGCTCACAGAGGATCTTCAGTAGATCTTGCAATTTTTAG…
Ptomaphagus pius	ABX3052	RMNH.INS.550311	Italy	Lazio: Villa Ada	2012-03-19	R. van Beek, T. Hoogenboom & P. de Jong	Menno Schilthuizen	658 bp (BOLD: CHOLH139-12)	CACCTTATATTTTATTTTTGGTGCATGAGCAGGAATAGTAGGGACTTCGTTAAGACTTTTAATTCGAGCAGAATTAGGAAACCCGGGAAGATTAATTGGAGATGATCAAATTTATAATGTAATTGTTACTGCCCATGCTTTCATTATAATTTTTTTTATAGTTATGCCTATTATAATTGGAGGATTTGGAAATTGATTAGTTCCTTTAATACTAGGAGCTCCTGATATAGCTTTTCCTCGAATAAATAATATAAGATTTTGACTTTTACCCCCTTCTTTAACTTTACTTTTAATAAGAAGAATAGTTGAAAATGGAGCAGGAACTGGATGAACAGTATACCCTCCTTTATCTTCTAATATTGCTCACAGAGGATCTTCAGTAGATCTTGCAATTTTTAG…
Ptomaphagus pius	ABX3052	RMNH.INS.550313	Italy	Lazio: Villa Ada	2012-03-19	R. van Beek, T. Hoogenboom & P. de Jong	Menno Schilthuizen	658 bp (BOLD: CHOLH141-12)	CACCTTATATTTTATTTTTGGTGCATGAGCAGGAATAGTAGGGACTTCGTTAAGACTTTTAATTCGAGCAGAATTAGGGAACCCGGGAAGATTAATTGGAGATGATCAAATTTATAATGTAATTGTTACTGCCCATGCTTTCATTATAATTTTTTTTATAGTTATGCCTATTATAATTGGAGGATTTGGAAATTGATTAGTTCCTTTAATACTAGGAGCTCCTGATATAGCTTTTCCTCGAATAAATAATATAAGATTTTGACTTTTACCTCCTTCTTTAACTTTACTTTTAATAAGAAGAATAGTTGAAAATGGAGCAGGAACTGGATGAACAGTATACCCTCCTTTATCTTCTAATATTGCTCACAGAGGATCTTCAGTAGATCTTGCAATTTTTAG…
Ptomaphagus pius	ABX3052	RMNH.INS.550314	Italy	Lazio: Villa Ada	2012-03-19	R. van Beek, T. Hoogenboom & P. de Jong	Menno Schilthuizen	658 bp (BOLD: CHOLH142-12)	CACCTTATATTTTATTTTTGGTGCATGAGCAGGAATAGTAGGGACTTCGTTAAGACTTTTAATTCGAGCAGAATTAGGAAACCCAGGAAGATTAATTGGAGATGATCAAATTTATAATGTAATTGTTACTGCCCATGCTTTCATTATAATTTTTTTTATAGTTATACCTATTATAATTGGAGGATTTGGAAATTGATTAGTTCCTTTAATACTAGGAGCTCCTGATATAGCTTTTCCTCGAATAAATAATATAAGATTTTGACTTTTACCTCCTTCTTTAACTTTACTTTTAATAAGAAGAATAGTTGAAAATGGAGCAGGAACTGGATGAACAGTATACCCTCCTTTATCTTCTAATATTGCTCACAGAGGATCTTCAGTAGATCTTGCAATTTTTAG…
Ptomaphagus pius	ABX3052	RMNH.INS.550315	Italy	Lazio: Villa Ada	2012-03-19	R. van Beek, T. Hoogenboom & P. de Jong	Menno Schilthuizen	658 bp (BOLD: CHOLH143-12)	CACCTTATATTTTATTTTTGGTGCATGAGCAGGAATAGTAGGGACTTCGTTAAGACTTTTAATTCGAGCAGAATTAGGAAACCCAGGAAGATTAATTGGAGATGATCAAATTTATAATGTAATTGTTACTGCCCATGCTTTCATTATAATTTTTTTTATAGTTATACCTATTATAATTGGAGGATTTGGAAATTGATTAGTTCCTTTAATACTAGGAGCTCCTGATATAGCTTTTCCTCGAATAAATAATATAAGATTTTGACTTTTACCTCCTTCTTTAACTTTACTTTTAATAAGAAGAATAGTTGAAAATGGAGCAGGAACTGGATGAACAGTATACCCTCCTTTATCTTCTAATATTGCTCACAGAGGATCTTCAGTAGATCTTGCAATTTTTAG…
Ptomaphagus pius	ABX3052	RMNH.INS.550316	Italy	Lazio: Villa Ada	2012-03-19	R. van Beek, T. Hoogenboom & P. de Jong	Menno Schilthuizen	658 bp (BOLD: CHOLH144-12)	CACCTTATATTTTATTTTTGGTGCATGAGCAGGAATAGTAGGGACTTCGTTAAGACTTTTAATTCGAGCAGAATTAGGGAACCCGGGAAGATTAATTGGAGATGATCAAATTTATAATGTAATTGTTACTGCCCATGCTTTCATTATAATTTTTTTTATAGTTATGCCTATTATAATTGGAGGATTTGGAAATTGATTAGTTCCTTTAATACTAGGAGCTCCTGATATAGCTTTTCCTCGAATAAATAATATAAGATTTTGACTTTTACCTCCTTCTTTAACTTTACTTTTAATAAGAAGAATAGTTGAAAATGGAGCAGGAACTGGATGAACAGTATACCCTCCTTTATCTTCTAATATTGCTCACAGAGGATCTTCAGTAGATCTTGCAATTTTTAG…
Ptomaphagus pius	ABX3052	RMNH.INS.550317	Italy	Lazio: Villa Ada	2012-03-19	R. van Beek, T. Hoogenboom & P. de Jong	Menno Schilthuizen	658 bp (BOLD: CHOLH145-12)	CACCTTATATTTTATTTTTGGTGCATGAGCAGGAATAGTAGGGACTTCGTTAAGACTTTTAATTCGAGCAGAATTAGGAAACCCAGGAAGATTAATTGGAGATGATCAAATTTATAATGTAATTGTTACTGCCCATGCTTTCATTATAATTTTTTTTATAGTTATACCTATTATAATTGGAGGATTTGGAAATTGATTAGTTCCTTTAATACTAGGAGCTCCTGATATAGCTTTTCCTCGAATAAATAATATAAGATTTTGACTTTTACCTCCTTCTTTAACTTTACTTTTAATAAGAAGAATAGTTGAAAATGGAGCAGGAACTGGATGAACAGTATACCCTCCTTTATCTTCTAATATTGCTCACAGAGGATCTTCAGTAGATCTTGCAATTTTTAG…
Ptomaphagus pius	ABX3052	RMNH.INS.550318	Italy	Lazio: Villa Ada	2012-03-19	R. van Beek, T. Hoogenboom & P. de Jong	Menno Schilthuizen	658 bp (BOLD: CHOLH146-12)	CACCTTATATTTTATTTTTGGTGCATGAGCAGGAATAGTAGGGACTTCGTTAAGACTTTTAATTCGAGCAGAATTAGGGAACCCGGGAAGATTAATTGGAGATGATCAAATTTATAATGTAATTGTTACTGCCCATGCTTTCATTATAATTTTTTTTATAGTTATGCCTATTATAATTGGAGGATTTGGAAATTGATTAGTTCCTTTAATACTAGGAGCTCCTGATATAGCTTTTCCTCGAATAAATAATATAAGATTTTGACTTTTACCTCCTTCTTTAACTTTACTTTTAATAAGAAGAATAGTTGAAAATGGAGCAGGAACTGGATGAACAGTATACCCTCCTTTATCTTCTAATATTGCTCACAGAGGATCTTCAGTAGATCTTGCAATTTTTAG…
Ptomaphagus subvillosus		RMNH.INS.63126	The Netherlands	Zuid-Holland: Den Haag	2009-03-12	R. v. Wijk & C. Scholte	Menno Schilthuizen	416 bp (BOLD: CHOLE073-10)	GATCACCTNATATAGCATTCCCTCGAATAAATAATAWAAGATTTTGACTTTTACCCCCTTCATTAACATTACTTTTAATAAGAAGAATAGTTGAAAATGGAGCAGGAACTGGTTGGACAGTTTACCCCCCACTATCTTCCAATATTGCTCATAGAGGATCCTCTGTAGATCTTGCAATTTTTAGTTTACATTTAGCAGGAATTTCCTCAATTTTAGGAGCCGTAAATTTTATTACTACAGTAATTAATATACGTTCTCCAGGAATAACATTAGATAAAATACCATTATTTGTTTGATCAGTAGTTATTACTGCTTTACTTTTACTTTTATCTCTCCCAGTATTAGCAGGAGCAATTACAATATTATTAACTGACCGAAATTTAAATACTTCTTTTTTTG…
Ptomaphagus subvillosus		RMNH.INS.63128	The Netherlands	Utrecht: IJsselstein	2009-03-01	R. v. Wijk & C. Scholte	Menno Schilthuizen	439 bp (BOLD: CHOLH251-13)	TCGAATAAATAATATAAGATTTTGACTTTTACCCCCTTCATTAACATTACTTTTAATAAGAAGAATAGTTGAAAATGGAGCAGGAACTGGTTGGACAGTTTACCCCCCACTATCTTCCAATATTGCTCATAGAGGATCCTCTGTAGATCTTGCAATTTTTAGTTTACATTTAGCAGGAATTTCCTCAATTTTAGGAGCCGTAAATTTTATTACTACAGTAATTAATATACGTTCTCCAGGAATAACATTAGATAAAATACCATTATTTGTTTGATCAGTAGTTATTACTGCTTTACTTTTACTTTTATCTCTCCCAGTATTAGCAGGAGCAATTACAATATTATTAACTGACCGAAATTTAAATACTTCTTTTTTTGACCCAGCAGGGGGAGGAGACCC…
Ptomaphagus subvillosus		RMNH.INS.63129	The Netherlands	Utrecht: IJsselstein	2009-03-01	R. v. Wijk & C. Scholte	Menno Schilthuizen	439 bp (BOLD: CHOLH252-13)	TCGAATAAATAATATAAGATTTTGACTTTTACCCCCTTCATTAACATTACTTTTAATAAGAAGAATAGTTGAAAATGGAGCAGGAACTGGTTGGACAGTTTACCCCCCACTATCTTCCAATATTGCTCATAGAGGATCCTCTGTAGATCTTGCAATTTTTAGTTTACATTTAGCAGGAATTTCCTCAATTTTAGGAGCCGTAAATTTTATTACTACAGTAATTAATATACGTTCTCCAGGAATAACATTAGATAAAATACCATTATTTGTTTGATCAGTAGTTATTACTGCTTTACTTTTACTTTTATCTCTCCCAGTATTAGCAGGAGCAATTACAATATTATTAACTGACCGAAATTTAAATACTTCTTTTTTTGACCCAGCAGGGGGAGGAGACCC…
Ptomaphagus subvillosus		RMNH.INS.63130	The Netherlands	Utrecht: IJsselstein	2009-03-12	R. v. Wijk & C. Scholte	Menno Schilthuizen	416 bp (BOLD: CHOLE074-10)	GATCACCTGATATAGCATTCCCTCGAATAAATMATATAAGATTTTGACTTTTACCCCCTTCATTAACATTACTTTTAATAAGAAGAATAGTTGAAAATGGAGCAGGAACTGGTTGGACAGTTTACCCCCCACTATCTTCCAATATTGCTCATAGAGGATCCTCTGTAGATCTTGCAATTTTTAGTTTACATTTAGCAGGAATTTCCTCAATTTTAGGAGCCGTAAATTTTATTACTACAGTAATTAATATACGTTCTCCAGGAATAACATTAGATAAAATACCATTATTTGTTTGATCAGTAGTTATTACTGCTTTACTTTTACTTTTATCTCTCCCAGTATTAGCAGGAGCAATTACAATATTATTAACTGACCGAAATTTAAATACTTCTTTTTTTG…
Ptomaphagus subvillosus		RMNH.INS.63132	The Netherlands	Utrecht: IJsselstein	2009-03-12	R. v. Wijk & C. Scholte	Menno Schilthuizen	416 bp (BOLD: CHOLE075-10)	GATCACCTGATATAGCATTCCCTCGAATAAATAATATAAGATTTTGACTTTTACCCCCTTCATTAACATTACTTTTAATAAGAAGAATAGTTGAAAATGGAGCAGGAACTGGTTGGACAGTTTACCCCCCACTATCTTCCAATATTGCTCATAGAGGATCCTCTGTAGATCTTGCAATTTTTAGTTTACATTTAGCAGGAATTTCCTCAATTTTAGGAGCCGTAAATTTTATTACTACAGTAATTAATATACGTTCTCCAGGAATAACATTAGATAAAATACCATTATTTGTTTGATCAGTAGTTATTACTGCTTTACTTTTACTTTTATCTCTCCCAGTATTAGCAGGAGCAATTACAATATTATTAACTGACCGAAATTTAAATACTTCTTTTTTTG…
Ptomaphagus subvillosus		RMNH.INS.63135	The Netherlands	Utrecht: IJsselstein	2009-03-12	R. v. Wijk & C. Scholte	Menno Schilthuizen	416 bp (BOLD: CHOLE076-10)	GATCACCTGATATAGCATTCCCTCGAATAAATAATATAAGATTTTGACTTTTACCCCCTTCATTAACATTACTTTTAATAAGAAGAATAGTTGAAAATGGAGCAGGAACTGGTTGGACAGTTTACCCCCCACTATCTTCCAATATTGCTCATAGAGGATCCTCTGTAGATCTTGCAATTTTTAGTTTACATTTAGCAGGAATTTCCTCAATTTTAGGAGCCGTAAATTTTATTACTACAGTAATTAATATACGTTCTCCAGGAATAACATTAGATAAAATACCATTATTTGTTTGATCAGTAGTTATTACTGCTTTACTTTTACTTTTATCTCTCCCAGTATTAGCAGGAGCAATTACAATATTATTAACTGACCGAAATTTAAATACTTCTTTTTTTG…
Ptomaphagus subvillosus		RMNH.INS.63137	The Netherlands	Utrecht: IJsselstein	2009-03-12	R. v. Wijk & C. Scholte	Menno Schilthuizen	416 bp (BOLD: CHOLE077-10)	GATCACCTGATATAGCATTCCCTCGAAKAAATAATATAAGATTTTGACTTTTACCCCCTTCATTAACATTACTTTTAATAAGAAGAATAGTTGAAAATGGGGCAGGAACTGGTTGGACAGTTTACCCCCCACTATCTTCCAATATTGCTCATAGAGGATCCTCTGTAGATCTTGCAATTTTTAGTTTACATTTAGCAGGAATTTCCTCAATTTTAGGAGCCGTAAATTTTATTACTACAGAAATTAATATACGTTCTCCAGGAATAACATTAGATAAAATACCATTATTTGTTTGATCAGTAGTTATTACTGCTTTACTTTTACTTTTATCTCTCCCAGTATTAGCAGGAGCAATTACAATATTATTAACTGACCGAAATTTAAATACTTCTTTTTTTG…
Ptomaphagus subvillosus		RMNH.INS.63141	The Netherlands	Utrecht: IJsselstein	2009-03-01	R. v. Wijk & C. Scholte	Menno Schilthuizen	439 bp (BOLD: CHOLH257-13)	TCGAATAAATAATATAAGATTTTGACTTTTACCCCCTTCATTAACATTACTTTTAATAAGAAGAATAGTTGAAAATGGAGCAGGAACTGGTTGGACAGTTTACCCCCCACTATCTTCCAATATTGCTCATAGAGGATCCTCTGTAGATCTTGCAATTTTTAGTTTACATTTAGCAGGAATTTCCTCAATTTTAGGAGCCGTAAATTTTATTACTACAGTAATTAATATACGTTCTCCAGGAATAACATTAGATAAAATACCATTATTTGTTTGATCAGTAGTTATTACTGCTTTACTTTTACTTTTATCTCTCCCAGTATTAGCAGGAGCAATTACAATATTATTAACTGACCGAAATTTAAATACTTCTTTTTTTGACCCAGCAGGGGGAGGAGACCC…
Ptomaphagus subvillosus		RMNH.INS.63143	The Netherlands	Utrecht: IJsselstein	2009-03-01	R. v. Wijk & C. Scholte	Menno Schilthuizen	439 bp (BOLD: CHOLH258-13)	TCGAATAAATAATATAAGATTTTGACTTTTACCCCCTTCATTAACATTACTTTTAATAAGAAGAATAGTTGAAAATGGAGCAGGAACTGGTTGGACAGTTTACCCCCCACTATCTTCCAATATTGCTCATAGAGGATCCTCTGTAGATCTTGCAATTTTTAGTTTACATTTAGCAGGAATTTCCTCAATTTTAGGAGCCGTAAATTTTATTACTACAGTAATTAATATACGTTCTCCAGGAATAACATTAGATAAAATACCATTATTTGTTTGATCAGTAGTTATTACTGCTTTACTTTTACTTTTATCTCTCCCAGTATTAGCAGGAGCAATTACAATATTATTAACTGACCGAAATTTAAATACTTCTTTTTTTGACCCAGCAGGGGGAGGAGACCC…
Ptomaphagus subvillosus		RMNH.INS.63145	The Netherlands	Utrecht: IJsselstein	2009-03-01	R. v. Wijk & C. Scholte	Menno Schilthuizen	439 bp (BOLD: CHOLH259-13)	TCGAATAAATAATATAAGATTTTGACTTTTACCCCCTTCATTAACATTACTTTTAATAAGAAGAATAGTTGAAAATGGAGCAGGAACTGGTTGGACAGTTTACCCCCCACTATCTTCCAATATTGCTCATAGAGGATCCTCTGTAGATCTTGCAATTTTTAGTTTACATTTAGCAGGAATTTCCTCAATTTTAGGAGCCGTAAATTTTATTACTACAGTAATTAATATACGTTCTCCAGGAATAACATTAGATAAAATACCATTATTTGTTTGATCAGTAGTTATTACTGCTTTACTTTTACTTTTATCTCTCCCAGTATTAGCAGGAGCAATTACAATATTATTAACTGACCGAAATTTAAATACTTCTTTTTTTGACCCAGCAGGGGGAGGAGACCC…
Ptomaphagus subvillosus		RMNH.INS.63147	The Netherlands	Utrecht: IJsselstein	2009-03-01	R. v. Wijk & C. Scholte	Menno Schilthuizen	439 bp (BOLD: CHOLH260-13)	TCGAATAAATAATATAAGATTTTGACTTTTACCCCCTTCATTAACATTACTTTTAATAAGAAGAATAGTTGAAAATGGAGCAGGAACTGGTTGGACAGTTTACCCCCCACTATCTTCCAATATTGCTCATAGAGGATCCTCTGTAGATCTTGCAATTTTTAGTTTACATTTAGCAGGAATTTCCTCAATTTTAGGAGCCGTAAATTTTATTACTACAGTAATTAATATACGTTCTCCAGGAATAACATTAGATAAAATACCATTATTTGTTTGATCAGTAGTTATTACTGCTTTACTTTTACTTTTATCTCTCCCAGTATTAGCAGGAGCAATTACAATATTATTAACTGACCGAAATTTAAATACTTCTTTTTTTGACCCAGCAGGGGGAGGAGACCC…
Ptomaphagus subvillosus		RMNH.INS.63191	The Netherlands	Limburg: Brunssummerheide	2010-03-01	D. van der Horst & J. Dommershuijzen	Menno Schilthuizen	439 bp (BOLD: CHOLH261-13)	TCGAATAAATAATATAAGATTTTGATTTTTACCCCCTTCATTAACATTACTTTTAATAAGAAGAATAGTTGAAAATGGAGCAGGAACTGGTTGGACAGTTTACCCCCCACTATCTTCCAATATTGCTCATAGAGGATCCTCTGTAGATCTTGCAATTTTTAGTTTACATTTAGCAGGAATTTCCTCAATTTTAGGAGCCGTAAATTTTATTACTACAGTAATTAATATACGTTCTCCAGGAATAACATTAGATAAAATACCATTATTTGTTTGATCAGTAGTTATTACTGCTTTACTTTTACTTTTATCTCTCCCAGTATTAGCAGGAGCAATTACAATATTATTAACTGACCGAAATTTAAATACTTCTTTTTTTGACCCAGCAGGGGGAGGAGACCC…
Ptomaphagus subvillosus		RMNH.INS.63203	The Netherlands	Limburg: Brunssummerheide	2010-03-01	D. van der Horst & J. Dommershuijzen	Menno Schilthuizen	439 bp (BOLD: CHOLH262-13)	TCGAATAAATAATATAAGATTTTGGCTTTTACCCCCTTCATTAACATTACTTTTAATAAGAAGAATAGTTGAAAATGGAGCAGGAACTGGTTGGACAGTTTACCCCCCACTATCTTCCAATATTGCTCATAGAGGATCCTCTGTAGATCTTGCAATTTTTAGTTTACATTTAGCAGGAATTTCCTCAATTTTAGGAGCCGTAAATTTTATTACTACAGTAATTAATATACGTTCTCCAGGAATAACATTAGATAAAATACCATTATTTGTTTGATCAGTAGTTATTACTGCTTTACTTTTACTTTTATCTCTCCCAGTATTAGCAGGAGCAATTACAATATTATTAACTGACCGAAATTTAAATACTTCTTTTTTTGACCCAGCAGGGGGAGGAGACCC…
Ptomaphagus subvillosus		RMNH.INS.63204	The Netherlands	Limburg: Bemelerberg	2010-03-01	D. van der Horst & J. Dommershuijzen	Menno Schilthuizen	439 bp (BOLD: CHOLH263-13)	TCGAATAAATAATATAAGATTTTGATTTTTACCCCCTTCATTAACATTACTTTTAATAAGAAGAATAGTTGAAAATGGAGCAGGAACTGGTTGGACAGTTTACCCCCCACTATCTTCCAATATTGCTCATAGAGGATCCTCTGTAGATCTTGCAATTTTTAGTTTACATTTAGCAGGAATTTCCTCAATTTTAGGAGCCGTAAATTTTATTACTACAGTAATTAATATACGTTCTCCAGGAATAACATTAGATAAAATACCATTATTTGTTTGATCAGTAGTTATTACTGCTTTACTTTTACTTTTATCTCTCCCAGTATTAGCAGGAGCAATTACAATATTATTAACTGACCGAAATTTAAATACTTCTTTTTTTGACCCAGCAGGGGGAGGAGACCC…
Ptomaphagus subvillosus		RMNH.INS.63205	The Netherlands	Limburg: Bemelerberg	2010-03-01	D. van der Horst & J. Dommershuijzen	Menno Schilthuizen	439 bp (BOLD: CHOLH264-13)	TCGAATAAATAATATAAGATTTTGATTTTTACCCCCTTCATTAACATTACTTTTAATAAGAAGAATAGTTGAAAATGGAGCAGGAACTGGTTGGACAGTTTACCCCCCACTATCTTCCAATATTGCTCATAGAGGATCCTCTGTAGATCTTGCAATTTTTAGTTTACATTTAGCAGGAATTTCCTCAATTTTAGGAGCCGTAAATTTTATTACTACAGTAATTAATATACGTTCTCCAGGAATAACATTAGATAAAATACCATTATTTGTTTGATCAGTAGTTATTACTGCTTTACTTTTACTTTTATCTCTCCCAGTATTAGCAGGAGCAATTACAATATTATTAACTGACCGAAATTTAAATACTTCTTTTTTTGACCCAGCAGGGGGAGGAGACCC…
Ptomaphagus thebeatles		RMNH.INS.63311	The Netherlands	Zuid-Holland: Leiden	2011-03-01	Devi van der Horst	Menno Schilthuizen	439 bp (BOLD: CHOLH270-13)	TCGAATAAATAATATAAGATTTTGACTTTTACCACCTTCATTAACTTTATTATTAATGAGAAGAATAGTAGAAAATGGAGCAGGAACTGGATGAACAGTTTATCCTCCTCTTTCTTCTAATATTGCTCATAGAGGATCTTCAGTAGATTTAGCAATTTTTAGATTACATTTAGCAGGAATTTCATCAATTTTAGGAGCTGTTAATTTTATTACAACTGTAATTAATATACGTTCTCCAGGAATAACTTTAGATAAAATACCTTTATTTGTTTGATCTGTAGCTATTACTGCTTTATTACTACTTTTATCTTTACCAGTATTAGCAGGAGCTATTACTATATTATTAACAGATCGAAATTTAAATACTTCTTTTTTTGATCCTGCAGGAGGAGGAGATCC…
Ptomaphagus subvillosus		RMNH.INS.63312	The Netherlands	Zuid-Holland: Leiden	2011-03-01	Devi van der Horst	Menno Schilthuizen	439 bp (BOLD: CHOLH270-13)	TCGAATAAATAATATAAGATTTTGACTTTTACCACCTTCATTAACTTTATTATTAATGAGAAGAATAGTAGAAAATGGAGCAGGAACTGGATGAACAGTTTATCCTCCTCTTTCTTCTAATATTGCTCATAGAGGATCTTCAGTAGATTTAGCAATTTTTAGATTACATTTAGCAGGAATTTCATCAATTTTAGGAGCTGTTAATTTTATTACAACTGTAATTAATATACGTTCTCCAGGAATAACTTTAGATAAAATACCTTTATTTGTTTGATCTGTAGCTATTACTGCTTTATTACTACTTTTATCTTTACCAGTATTAGCAGGAGCTATTACTATATTATTAACAGATCGAAATTTAAATACTTCTTTTTTTGATCCTGCAGGAGGAGGAGATCC…
Ptomaphagus thebeatles		RMNH.INS.63313	The Netherlands	Zuid-Holland: Leiden	2011-03-01	Devi van der Horst	Menno Schilthuizen	439 bp (BOLD: CHOLH272-13)	TCGAATAAATAATATAAGATTTTGACTTTTACCACCTTCATTAACTTTATTATTAATGAGAAGAATAGTAGAAAATGGAGCAGGAACTGGATGAACAGTTTATCCTCCTCTTTCTTCTAATATTGCTCATAGAGGATCTTCAGTAGATTTAGCAATTTTTAGATTACATTTAGCAGGAATTTCATCAATTTTAGGAGCTGTTAATTTTATTACAACTGTAATTAATATACGTTCTCCAGGAATAACTTTAGATAAAATACCTTTATTTGTTTGATCTGTAGCTATTACTGCTTTATTACTACTTTTATCTTTACCAGTATTAGCAGGAGCTATTACTATATTATTAACAGATCGAAATTTAAATACTTCTTTTTTTGATCCTGCAGGAGGAGGAGATCC…
Ptomaphagus thebeatles		RMNH.INS.63314	The Netherlands	Zuid-Holland: Leiden	2011-03-01	Devi van der Horst	Menno Schilthuizen	439 bp (BOLD: CHOLH273-13)	TCGAATAAATAATATAAGATTTTGACTTTTACCACCTTCATTAACTTTATTATTAATGAGAAGAATAGTAGAAAATGGAGCAGGAACTGGATGAACAGTTTATCCTCCTCTTTCTTCTAATATTGCTCATAGAGGATCTTCAGTAGATTTAGCAATTTTTAGATTACATTTAGCAGGAATTTCATCAATTTTAGGAGCTGTTAATTTTATTACAACTGTAATTAATATACGTTCTCCAGGAATAACTTTAGATAAAATACCTTTATTTGTTTGATCTGTAGCTATTACTGCTTTATTACTACTTTTATCTTTACCAGTATTAGCAGGAGCTATTACTATATTATTAACAGATCGAAATTTAAATACTTCTTTTTTTGATCCTGCAGGAGGAGGAGATCC…
Ptomaphagus subvillosus		RMNH.INS.63315	The Netherlands	Zuid-Holland: Leiden	2011-03-01	Devi van der Horst	Menno Schilthuizen	439 bp (BOLD: CHOLH274-13)	TCGAATAAATAATATAAGATTTTGACTTTTACCCCCTTCATTAACATTACTTTTAATAAGAAGAATAGTTGAAAATGGAGCAGGAACTGGTTGGACAGTTTACCCCCCACTATCTTCCAATATTGCTCATAGAGGATCCTCTGTAGATCTTGCAATTTTTAGTTTACATTTAGCAGGAATTTCCTCAATTTTAGGAGCCGTAAATTTTATTACTACAGTAATTAATATACGTTCTCCAGGAATAACATTAGATAAAATACCATTATTTGTTTGATCAGTAGTTATTACTGCTTTACTTTTACTTTTATCTCTCCCAGTATTAGCAGGAGCAATTACAATATTATTAACTGACCGAAATTTAAATACTTCTTTTTTTGACCCAGCAGGGGGAGGAGACCC…
Ptomaphagus thebeatles		RMNH.INS.63316	The Netherlands	Zuid-Holland: Leiden	2011-03-01	Devi van der Horst	Menno Schilthuizen	439 bp (BOLD: CHOLH275-13)	TCGAATAAATAATATAAGATTTTGACTTTTACCACCTTCATTAACTTTATTATTAATGAGAAGAATAGTAGAAAATGGAGCAGGAACTGGATGAACAGTTTATCCTCCTCTTTCTTCTAATATTGCTCATAGAGGATCTTCAGTAGATTTAGCAATTTTTAGATTACATTTAGCAGGAATTTCATCAATTTTAGGAGCTGTTAATTTTATTACAACTGTAATTAATATACGTTCTCCAGGAATAACTTTAGATAAAATACCTTTATTTGTTTGATCTGTAGCTATTACTGCTTTATTACTACTTTTATCTTTACCAGTATTAGCAGGAGCTATTACTATATTATTAACAGATCGAAATTTAAATACTTCTTTTTTTGATCCTGCAGGAGGAGGAGATCC…
Ptomaphagus thebeatles		RMNH.INS.63317	The Netherlands	Zuid-Holland: Leiden	2011-03-01	Devi van der Horst	Menno Schilthuizen	439 bp (BOLD: CHOLH276-13)	TCGAATAAATAATATAAGATTTTGACTTTTACCACCTTCATTAACTTTATTATTAATGAGAAGAATAGTAGAAAATGGAGCAGGAACTGGATGAACAGTTTATCCTCCTCTTTCTTCTAATATTGCTCATAGAGGATCTTCAGTAGATTTAGCAATTTTTAGATTACATTTAGCAGGAATTTCATCAATTTTAGGAGCTGTTAATTTTATTACAACTGTAATTAATATACGTTCTCCAGGAATAACTTTAGATAAAATACCTTTATTTGTTTGATCTGTAGCTATTACTGCTTTATTACTACTTTTATCTTTACCAGTATTAGCAGGAGCTATTACTATATTATTAACAGATCGAAATTTAAATACTTCTTTTTTTGATCCTGCAGGAGGAGGAGATCC…
Ptomaphagus medius	AAU6931	RMNH.INS.63320	The Netherlands	Zuid-Holland: Oegstgeest	2011-03-01	Devi van der Horst	Menno Schilthuizen	439 bp (BOLD: CHOLH279-13)	TCGAATAAACAATATAAGATTTTGACTTTTACCTCCTTCATTAACTTTATTATTAATAAGAAGAATAGTTGAAAACGGAGCAGGAACTGGATGAACAGTTTATCCTCCTCTATCTTCTAATATTGCTCATAGAGGATCTTCAGTAGATTTAGCAATTTTTAGATTACATTTAGCAGGAATTAGATCAATTTTAGGAGCTGTAAATTTTATTACAACTGTAATCAATATACGTTCTCCAGGAATAACTTTAGATAAAATACCTTTATTTGTATGATCTGTAGCTATTACTGCTTTATTATTACTTTTATCTTTACCAGTTTTAGCAGGAGCAATTACAATATTATTAACAGATCGAAATTTAAATACTTCTTTTTTTGATCCTGCAGGAGGAGGAGACCC…
Ptomaphagus medius	AAU6931	RMNH.INS.63321	The Netherlands	Zuid-Holland: Oegstgeest	2011-03-01	Devi van der Horst	Menno Schilthuizen	439 bp (BOLD: CHOLH280-13)	TCGAATAAACAATATAAGATTTTGACTTTTACCTCCTTCATTAACTTTATTATTAATAAGAAGAATAGTTGAAAACGGAGCAGGAACTGGATGAACAGTTTATCCTCCTCTATCTTCTAATATTGCTCATAGAGGATCTTCAGTAGATTTAGCAATTTTTAGATTACATTTAGCAGGAATTAGATCAATTTTAGGAGCTGTAAATTTTATTACAACTGTAATCAATATACGTTCTCCAGGAATAACTTTAGATAAAATACCTTTATTTGTATGATCTGTAGCTATTACTGCTTTATTATTACTTTTATCTTTACCAGTTTTAGCAGGAGCAATTACAATATTATTAACAGATCGAAATTTAAATACTTCTTTTTTTGATCCTGCAGGAGGAGGAGACCC…
Ptomaphagus subvillosus		RMNH.INS.63324	The Netherlands	Zuid-Holland: Oostvoorne	2010-03-20	Devi van der Horst	Menno Schilthuizen	439 bp (BOLD: CHOLH283-13)	TCGAATAAATAATATAAGATTTTGACTTTTACCCCCTTCATTAACATTACTTTTAATAAGAAGAATAGTTGAAAATGGAGCAGGAACTGGTTGGACAGTTTACCCCCCACTATCTTCCAATATTGCTCATAGAGGATCCTCTGTAGATCTTGCAATTTTTAGTTTACATTTAGCAGGAATTTCCTCAATTTTAGGAGCCGTAAATTTTATTACTACAGTAATTAATATACGTTCTCCAGGAATAACATTAGATAAAATACCATTATTTGTTTGATCAGTAGTTATTACTGCTTTACTTTTACTTTTATCTCTCCCAGTATTAGCAGGAGCAATTACAATATTATTAACTGACCGAAATTTAAATACTTCTTTTTTTGACCCAGCAGGGGGAGGAGACCC…
Ptomaphagus medius	AAU6931	RMNH.INS.63331	The Netherlands	Utrecht: De Blaauwe Kamer	2012-12-28	Dick Belgers	Menno Schilthuizen	439 bp (BOLD: CHOLH290-13)	TCGAATAAACAATATAAGATTTTGACTTTTACCTCCTTCATTAACTTTATTATTAATAAGAAGAATAGTTGAAAACGGAGCAGGAACTGGATGAACAGTTTATCCTCCTCTATCTTCTAATATTGCTCATAGAGGATCTTCAGTAGATTTAGCAATTTTTAGATTACATTTAGCAGGAATTAGATCAATTTTAGGAGCTGTAAATTTTATTACAACTGTAATCAATATACGTTCTCCAGGGATAACTTTAGATAAAATACCTTTATTTGTATGATCTGTAGCTATTACTGCTTTATTATTACTTTTATCTTTACCAGTTTTAGCAGGAGCAATTACAATATTATTAACAGATCGAAATTTAAATACTTCTTTTTTTGATCCTGCAGGAGGAGGAGACCC…
Ptomaphagus medius	AAU6931	RMNH.INS.63332	The Netherlands	Utrecht: De Blaauwe Kamer	2012-12-28	Dick Belgers	Menno Schilthuizen	439 bp (BOLD: CHOLH291-13)	TCGAATAAACAATATAAGATTTTGACTTTTACCTCCTTCATTAACTTTATTATTAATAAGAAGAATAGTTGAAAACGGAGCAGGAACTGGATGAACAGTTTATCCTCCTCTATCTTCTAATATTGCTCATAGAGGATCTTCAGTAGATTTAGCAATTTTTAGATTACATTTAGCAGGAATTAGATCAATTTTAGGAGCTGTAAATTTTATTACAACTGTAATCAATATACGTTCTCCAGGGATAACTTTAGATAAAATACCTTTATTTGTATGATCTGTAGCTATTACTGCTTTATTATTACTTTTATCTTTACCAGTTTTAGCAGGAGCAATTACAATATTATTAACAGATCGAAATTTAAATACTTCTTTTTTTGATCCTGCAGGAGGAGGAGACCC…
Ptomaphagus medius	AAU6931	RMNH.INS.63333	The Netherlands	Utrecht: De Blaauwe Kamer	2012-12-28	Dick Belgers	Menno Schilthuizen	439 bp (BOLD: CHOLH292-13)	TCGAATAAACAATATAAGATTTTGACTTTTACCTCCTTCATTAACTTTATTATTAATAAGAAGAATAGTTGAAAACGGAGCAGGAACTGGATGAACAGTTTATCCTCCTCTATCTTCTAATATTGCTCATAGAGGATCTTCAGTAGATTTAGCAATTTTTAGATTACATTTAGCAGGAATTAGATCAATTTTAGGAGCTGTAAATTTTATTACAACTGTAATCAATATACGTTCTCCAGGGATAACTTTAGATAAAATACCTTTATTTGTATGATCTGTAGCTATTACTGCTTTATTATTACTTTTATCTTTACCAGTTTTAGCAGGAGCAATTACAATATTATTAACAGATCGAAATTTAAATACTTCTTTTTTTGATCCTGCAGGAGGAGGAGACCC…
Ptomaphagus subvillosus		RMNH.INS.63334	The Netherlands	Utrecht: De Blaauwe Kamer	2012-12-28	Dick Belgers	Menno Schilthuizen	439 bp (BOLD: CHOLH293-13)	TCGAATAAATAATATAAGATTTTGACTTTTACCCCCTTCATTAACATTACTTTTAATAAGAAGAATAGTTGAAAATGGAGCAGGAACTGGTTGGACAGTTTACCCCCCTCTATCTTCCAATATTGCTCATAGAGGATCCTCTGTAGATCTTGCAATTTTTAGTTTACATTTAGCAGGAATTTCCTCAATTTTAGGAGCCGTAAATTTTATTACTACAGTAATTAATATACGTTCTCCAGGAATAACATTAGATAAAATACCATTATTTGTTTGATCAGTAGTTATTACTGCTTTACTTTTACTTTTATCTCTCCCAGTATTAGCAGGAGCAATTACAATATTATTAACTGACCGAAATTTAAATACTTCTTTTTTTGACCCAGCAGGGGGAGGAGATCC…
Ptomaphagus medius	AAU6931	RMNH.INS.63343	The Netherlands	Gelderland: Arnhem: Koningsheide	2013-08-01	Albert den Dees	Menno Schilthuizen	439 bp (BOLD: CHOLH302-13)	TCGAATAAACAATATAAGATTTTGACTTTTACCTCCTTCATTAACTTTATTATTAATAAGAAGAATAGTTGAAAACGGAGCAGGAACTGGATGAACAGTTTATCCTCCTCTATCTTCTAATATTGCTCATAGAGGATCTTCAGTAGATTTAGCAATTTTTAGATTACATTTAGCAGGAATTAGATCAATTTTAGGAGCTGTAAATTTTATTACAACTGTAATCAATATACGTTCTCCAGGAATAACTTTAGATAAAATACCTTTATTTGTATGATCTGTAGCTATTACTGCTTTATTATTACTTTTATCTTTACCAGTTTTAGCAGGAGCAATTACAATATTATTAACAGATCGAAATTTAAATACTTCTTTTTTTGATCCTGCAGGAGGAGGAGACCC…
Ptomaphagus thebeatles		RMNH.INS.63344	The Netherlands	Gelderland: Arnhem: Koningsheide	2013-08-01	Albert den Dees	Menno Schilthuizen	439 bp (BOLD: CHOLH303-13)	TCGAATAAATAATATAAGATTTTGACTTTTACCACCTTCATTAACTTTATTATTAATGAGAAGAATAGTAGAAAATGGAGCAGGAACTGGATGAACAGTTTATCCTCCTCTTTCTTCTAATATTGCTCATAGAGGATCTTCAGTAGATTTAGCAATTTTTAGATTACATTTAGCAGGAATTTCATCAATTTTAGGAGCTGTTAATTTTATTACAACTGTAATTAATATACGTTCTCCAGGAATAACTTTAGATAAAATACCTTTATTTGTTTGATCTGTAGCTATTACTGCTTTATTACTACTTTTATCTTTACCAGTATTAGCAGGAGCTATTACTATATTATTAACAGATCGAAATTTAAATACTTCTTTTTTTGATCCTGCAGGAGGAGGAGATCC…
Ptomaphagus medius	AAU6931	RMNH.INS.63345	The Netherlands	Gelderland: Arnhem: Koningsheide	2013-08-01	Albert den Dees	Menno Schilthuizen	439 bp (BOLD: CHOLH304-13)	TCGAATAAACAATATAAGATTTTGACTTTTACCTCCTTCATTAACTTTATTATTAATAAGAAGAATAGTTGAAAACGGAGCAGGAACTGGATGAACAGTTTATCCTCCTCTATCTTCTAATATTGCTCATAGAGGATCTTCAGTAGATTTAGCAATTTTTAGATTACATTTAGCAGGAATTAGATCAATTTTAGGAGCTGTAAATTTTATTACAACTGTAATCAATATACGTTCTCCAGGGATAACTTTAGATAAAATACCTTTATTTGTATGATCTGTAGCTATTACTGCTTTATTATTACTTTTATCTTTACCAGTTTTAGCAGGAGCAATTACAATATTATTAACAGATCGAAATTTAAATACTTCTTTTTTTGATCCTGCAGGAGGAGGAGACCC…
Ptomaphagus subvillosus		RMNH.INS.63352	Italy	Veneto: Velo Veronese; Tana delle Sponde	2013-04-22	Leonardo Latella	Menno Schilthuizen	439 bp (BOLD: CHOLH230-13)	TCGAATAAATAATATAAGATTTTGACTTTTACCCCCTTCATTAACATTGCTTTTAATAAGAAGAATAGTTGAAAATGGAGCAGGAACTGGTTGGACAGTTTGCCCCCCACTATCTTCCAATATTGCTCATAGAGGATCCTCTGTAGATCTTGCAATTTTTAGTTTACATTTAGCAGGAATTTCCTCAATTTTAGGAGCCGTAAATTTTATTACTACAGTAATTAATATACGTTCTCCAGGAATAACATTAGATAAAATACCATTATTTGTTTGATCAGTAGTTATTACTGCTTTACTTTTACTTTTATCTCTCCCAGTATTAGCAGGAGCAATTACAATATTATTAACTGACCGAAATTTAAATACTTCTTTTTTTGACCCAGCAGGGGGAGGAGACCC…
Ptomaphagus cf. chendae		RMNH.INS.63353	Italy	Velo Veronese; Tana delle Sponde	2013-04-22	Leonardo Latella	Menno Schilthuizen	439 bp (BOLD: CHOLH231-13)	TCGAATAAACAATATAAGATTTTGACTTTTACCACCTTCATTAACTTTATTGCTAATAAGAAGAATAGTAGAAAATGGAGCTGGAACGGGATGAACAGTTTATCCTCCTTTATCCTCTAATATTGCCCATAGAGGTTCTTCAGTAGATTTAGCTATTTTTAGACTACATTTAGCAGGAATCTCTTCTATTTTAGGAGCAGTAAATTTTATCACCACAGTAATTAATATACGTTCCCCAGGAATAACTTTAGATAAAATACCATTATTTGTATGATCAGTAGTTATTACTGCTTTACTTCTACTTTTATCTCTTCCAGTATTAGCAGGAGCTATTACAATACTGTTAACAGATCGAAATTTAAATACTTCCTTTTTTGATCCTGCAGGAGGAGGAGATCC…
Ptomaphagus tenuicornis mauritanicus		RMNH.INS.63354	Italy	Sicily: Nebrodi Mountains	2012-06-23	Leonardo Latella	Menno Schilthuizen	439 bp (BOLD: CHOLH232-13)	CCGAATAAACAATATAAGATTTTGACTTTTACCCCCTTCATTAACTTTATTATTAATAAGAAGAATAGTAGAAAATGGAGCAGGTACTGGATGAACAGTTTACCCCCCCTTATCTTCTAATATTGCTCATAGAGGATCTTCAGTAGATCTCGCAATTTTTAGATTACATTTAGCAGGAATTTCTTCAATTTTAGGTGCTGTAAATTTTATTACTACTGTAATTAATATACGTTCTCCAGGAATAACATTAGATAAAATACCATTATTTATTTGATCAGTAGCTATTACTGCTTTACTTTTACTTTTATCTCTCCCAGTATTAGCAGGAGCAATTACAATATTATTAACTGATCGAAATTTAAATACTTCTTTTTTTGACCCAGCAGGGGGAGGAGACCC…
Ptomaphagus medius		RMNH.INS.63355	France	Languedoc-Rousillon: Aude: Les Arnoulats	2013-09-01	Stefan Visser & Wesley van Oostenbrugge	Menno Schilthuizen	439 bp (BOLD: CHOLH233-13)	TCGAATAAATAATATGAGATTTTGACTTTTACCCCCTTCATTAACTTTATTATTAATAAGAAGAATAGTGGAAAATGGAGCAGGGACTGGATGAACAGTTTATCCTCCTCTTTCTTCTAATATTGCTCATAGAGGATCTTCAGTAGATTTAGCAATTTTTAGATTACATTTAGCAGGAATTTCATCAATTTTAGGAGCTGTTAATTTTATTACAACTGTAATTAATATACGTTCTCCAGGGATAACTTTAGATAAAATACCTTTATTTGTTTGATCTGTAGCTATTACTGCTTTATTATTACTTTTATCTTTACCAGTATTAGCAGGAGCTATTACTATATTATTAACAGATCGAAATTTAAATACTTCTTTTTTTGATCCTGCAGGAGGAGGAGACCC…
Ptomaphagus medius		RMNH.INS.63356	France	Languedoc-Rousillon: Aude: Les Arnoulats	2013-09-01	Stefan Visser & Wesley van Oostenbrugge	Menno Schilthuizen	439 bp (BOLD: CHOLH234-13)	TCGAATAAATAATATGAGATTTTGACTTTTACCCCCTTCATTAACTTTATTATTAATAAGAAGAATAGTGGAAAATGGAGCAGGGACTGGATGAACAGTTTATCCTCCTCTTTCTTCTAATATTGCTCATAGAGGATCTTCAGTAGATTTAGCAATTTTTAGATTACATTTAGCAGGAATTTCATCAATTTTAGGAGCTGTTAATTTTATTACAACTGTAATTAATATACGTTCTCCAGGGATAACTTTAGATAAAATACCTTTATTTGTTTGATCTGTAGCTATTACTGCTTTATTATTACTTTTATCTTTACCAGTATTAGCAGGAGCTATTACTATATTATTAACAGATCGAAATTTAAATACTTCTTTTTTTGATCCTGCAGGAGGAGGAGACCC…
Ptomaphagus medius		RMNH.INS.63357	France	Languedoc-Rousillon: Aude: Les Arnoulats	2013-09-01	Stefan Visser & Wesley van Oostenbrugge	Menno Schilthuizen	439 bp (BOLD: CHOLH235-13)	TCGAATAAATAATATGAGATTTTGACTTTTACCCCCTTCATTAACTTTATTATTAATAAGAAGAATAGTGGAAAATGGAGCAGGGACTGGATGAACAGTTTATCCTCCTCTTTCTTCTAATATTGCTCATAGAGGATCTTCAGTAGATTTAGCAATTTTTAGATTACATTTAGCAGGAATTTCATCAATTTTAGGAGCTGTTAATTTTATTACAACTGTAATTAATATACGTTCTCCAGGGATAACTTTAGATAAAATACCTTTATTTGTTTGATCTGTAGCTATTACTGCTTTATTATTACTTTTATCTTTACCAGTATTAGCAGGAGCTATTACTATATTATTAACAGATCGAAATTTAAATACTTCTTTTTTTGATCCTGCAGGAGGAGGAGACCC…
Ptomaphagus medius		RMNH.INS.63358	France	Languedoc-Rousillon: Aude: Les Arnoulats	2013-09-01	Stefan Visser & Wesley van Oostenbrugge	Menno Schilthuizen	439 bp (BOLD: CHOLH236-13)	TCGAATAAATAATATGAGATTTTGACTTTTACCCCCTTCATTAACTTTATTATTAATAAGAAGAATAGTGGAAAATGGAGCAGGGACTGGATGAACAGTTTATCCTCCTCTTTCTTCTAATATTGCTCATAGAGGATCTTCAGTAGATTTAGCAATTTTTAGATTACATTTAGCAGGAATTTCATCAATTTTAGGAGCTGTTAATTTTATTACAACTGTAATTAATATACGTTCTCCAGGGATAACTTTAGATAAAATACCTTTATTTGTTTGATCTGTAGCTATTACTGCTTTATTATTACTTTTATCTTTACCAGTATTAGCAGGAGCTATTACTATATTATTAACAGATCGAAATTTAAATACTTCTTTTTTTGATCCTGCAGGAGGAGGAGACCC…
Ptomaphagus medius		RMNH.INS.63359	France	Languedoc-Rousillon: Aude: Les Arnoulats	2013-09-01	Stefan Visser & Wesley van Oostenbrugge	Menno Schilthuizen	439 bp (BOLD: CHOLH237-13)	TCGAATAAATAATATGAGATTTTGACTTTTACCCCCTTCATTAACTTTATTATTAATAAGAAGAATAGTGGAAAATGGAGCAGGGACTGGATGAACAGTTTATCCTCCTCTTTCTTCTAATATTGCTCATAGAGGATCTTCAGTAGATTTAGCAATTTTTAGATTACATTTAGCAGGAATTTCATCAATTTTAGGAGCTGTTAATTTTATTACAACTGTAATTAATATACGTTCTCCAGGGATAACTTTAGATAAAATACCTTTATTTGTTTGATCTGTAGCTATTACTGCTTTATTATTACTTTTATCTTTACCAGTATTAGCAGGAGCTATTACTATATTATTAACAGATCGAAATTTAAATACTTCTTTTTTTGATCCTGCAGGAGGAGGAGACCC…
Ptomaphagus medius		RMNH.INS.63360	France	Languedoc-Rousillon: Aude: Les Arnoulats	2013-09-01	Stefan Visser & Wesley van Oostenbrugge	Menno Schilthuizen	439 bp (BOLD: CHOLH238-13)	TCGAATAAATAATATGAGATTTTGACTTTTACCCCCTTCATTAACTTTATTATTAATAAGAAGAATAGTGGAAAATGGAGCAGGGACTGGATGAACAGTTTATCCTCCTCTTTCTTCTAATATTGCTCATAGAGGATCTTCAGTAGATTTAGCAATTTTTAGATTACATTTAGCAGGAATTTCATCAATTTTAGGAGCTGTTAATTTTATTACAACTGTAATTAATATACGTTCTCCAGGGATAACTTTAGATAAAATACCTTTATTTGTTTGATCTGTAGCTATTACTGCTTTATTATTACTTTTATCTTTACCAGTATTAGCAGGAGCTATTACTATATTATTAACAGATCGAAATTTAAATACTTCTTTTTTTGATCCTGCAGGAGGAGGAGACCC…
Ptomaphagus medius		RMNH.INS.63361	France	Languedoc-Rousillon: Aude: Les Arnoulats	2013-09-01	Stefan Visser & Wesley van Oostenbrugge	Menno Schilthuizen	439 bp (BOLD: CHOLH239-13)	TCGAATAAATAATATGAGATTTTGACTTTTACCCCCTTCATTAACTTTATTATTAATAAGAAGAATAGTGGAAAATGGAGCAGGGACTGGATGAACAGTTTATCCTCCTCTTTCTTCTAATATTGCTCATAGAGGATCTTCAGTAGATTTAGCAATTTTTAGATTACATTTAGCAGGAATTTCATCAATTTTAGGAGCTGTTAATTTTATTACAACTGTAATTAATATACGTTCTCCAGGGATAACTTTAGATAAAATACCTTTATTTGTTTGATCTGTAGCTATTACTGCTTTATTATTACTTTTATCTTTACCAGTATTAGCAGGAGCTATTACTATATTATTAACAGATCGAAATTTAAATACTTCTTTTTTTGATCCTGCAGGAGGAGGAGACCC…
Ptomaphagus medius		RMNH.INS.63362	France	Languedoc-Rousillon: Aude: Les Arnoulats	2013-09-01	Stefan Visser & Wesley van Oostenbrugge	Menno Schilthuizen	439 bp (BOLD: CHOLH240-13)	TCGAATAAATAATATGAGATTTTGACTTTTACCCCCTTCATTAACTTTATTATTAATAAGAAGAATAGTGGAAAATGGAGCAGGGACTGGATGAACAGTTTATCCTCCTCTTTCTTCTAATATTGCTCATAGAGGATCTTCAGTAGATTTAGCAATTTTTAGATTACATTTAGCAGGAATTTCATCAATTTTAGGAGCTGTTAATTTTATTACAACTGTAATTAATATACGTTCTCCAGGGATAACTTTAGATAAAATACCTTTATTTGTTTGATCTGTAGCTATTACTGCTTTATTATTATTTTTATCTTTACCAGTATTAGCAGGAGCTATTACTATATTATTAACAGATCGAAATTTAAATACTTCTTTTTTTGATCCTGCAGGAGGAGGAGACCC…
Ptomaphagus subvillosus		RMNH.INS.63363	Italy	Turin: Meana di Susa	2013-09-01	Stefan Visser & Wesley van Oostenbrugge	Menno Schilthuizen	439 bp (BOLD: CHOLH241-13)	TCGAATAAATAATATAAGATTTTGACTTTTACCCCCTTCATTAACATTACTTTTAATAAGAAGAATAGTTGAAAATGGAGCAGGAACTGGTTGGACAGTTTACCCCCCACTATCTTCCAATATTGCTCATAGAGGATCCTCTGTAGATCTTGCAATTTTTAGTTTACATTTAGCAGGAATTTCCTCAATTTTAGGAGCCGTAAATTTTATTACTACAGTAATTAATATACGTTCTCCAGGAATAACATTAGATAAAATACCATTATTTGTTTGATCAGTAGTTATTACTGCTTTACTTTTACTTTTATCTCTCCCAGTATTAGCAGGAGCAATTACAATATTATTAACTGACCGAAATTTAAATACTTCTTTTTTTGACCCAGCAGGGGGAGGAGATCC…
Ptomaphagus subvillosus		RMNH.INS.63364	Italy	Turin: Meana di Susa	2013-09-01	Stefan Visser & Wesley van Oostenbrugge	Menno Schilthuizen	439 bp (BOLD: CHOLH242-13)	TCGAATAAATAATATAAGATTTTGACTTTTACCCCCTTCATTAACATTACTTTTAATAAGAAGAATAGTTGAAAATGGAGCAGGAACTGGTTGGACAGTTTACCCCCCACTATCTTCCAATATTGCTCATAGAGGATCCTCTGTAGATCTTGCAATTTTTAGTTTACATTTAGCAGGAATTTCCTCAATTTTAGGAGCCGTAAATTTTATTACTACAGTAATTAATATACGTTCTCCAGGAATAACATTAGATAAAATACCATTATTTGTTTGATCAGTAGTTATTACTGCTTTACTTTTACTTTTATCTCTCCCAGTATTAGCAGGAGCAATTACAATATTATTAACTGACCGAAATTTAAATACTTCTTTTTTTGACCCAGCAGGGGGAGGAGATCC…
Ptomaphagus subvillosus		RMNH.INS.63365	Italy	Turin: Meana di Susa	2013-09-01	Stefan Visser & Wesley van Oostenbrugge	Menno Schilthuizen	439 bp (BOLD: CHOLH243-13)	TCGAATAAATAATATAAGATTTTGATTTTTACCCCCTTCATTAACATTACTTTTAATAAGAAGAATAGTTGAAAATGGAGCAGGAACTGGTTGGACAGTTTACCCCCCACTATCTTCCAATATTGCTCATAGAGGATCCTCTGTAGATCTTGCAATTTTTAGTTTACATTTAGCAGGAATTTCCTCAATTTTAGGAGCCGTAAATTTTATTACTACAGTAATTAATATACGTTCTCCAGGAATAACATTAGATAAAATACCATTATTTGTTTGATCAGTAGTTATTACTGCTTTACTTTTACTTTTATCTCTCCCAGTATTAGCAGGAGCAATTACAATATTATTAACTGACCGAAATTTAAATACTTCTTTTTTTGACCCAGCAGGGGGAGGAGATCC…
Ptomaphagus subvillosus		RMNH.INS.63366	Italy	Turin: Meana di Susa	2013-09-01	Stefan Visser & Wesley van Oostenbrugge	Menno Schilthuizen	439 bp (BOLD: CHOLH244-13)	TCGAATAAATAATATAAGATTTTGATTTTTACCCCCTTCATTAACATTACTTTTAATAAGAAGAATAGTTGAAAATGGAGCAGGAACTGGTTGGACAGTTTACCCCCCACTATCTTCCAATATTGCTCATAGAGGATCCTCTGTAGATCTTGCAATTTTTAGTTTACATTTAGCAGGAATTTCCTCAATTTTAGGAGCCGTAAATTTTATTACTACAGTAATTAATATACGTTCTCCAGGAATAACATTAGATAAAATACCATTATTTGTTTGATCAGTAGTTATTACTGCTTTACTTTTACTTTTATCTCTCCCAGTATTAGCAGGAGCAATTACAATATTATTAACTGACCGAAATTTAAATACTTCTTTTTTTGACCCAGCAGGGGGAGGAGATCC…
Ptomaphagus thebeatles		RMNH.INS.63368	France	Braicon	2013-09-01	Stefan Visser & Wesley van Oostenbrugge	Menno Schilthuizen	439 bp (BOLD: CHOLH246-13)	TCGAATAAATAATATAAGATTTTGACTTTTACCACCTTCATTAACTTTATTATTAATGAGAAGAATAGTAGAAAATGGAGCAGGAACTGGATGAACAGTTTATCCTCCTCTTTCTTCTAATATTGCTCATAGAGGATCTTCAGTAGATTTAGCAATTTTTAGATTACATTTAGCAGGAATTTCATCAATTTTAGGAGCTGTTAATTTTATTACAACTGTAATTAATATACGTTCTCCAGGAATAACTTTAGATAAAATACCTTTATTTGTTTGATCTGTAGCTATTACTGCTTTATTACTACTTTTATCTTTACCAGTACTAGCAGGAGCTATTACTATATTATTAACAGATCGAAATTTAAATACTTCTTTTTTTGATCCTGCAGGAGGAGGAGATCC…
Ptomaphagus medius		RMNH.INS.63369	France	Ariège: Soula	2013-09-01	Stefan Visser & Wesley van Oostenbrugge	Menno Schilthuizen	439 bp (BOLD: CHOLH247-13)	TCGAATAAATAATATGAGATTTTGACTTTTACCCCCTTCATTAACTTTATTATTAATAAGAAGAATAGTGGAAAATGGAGCAGGGACTGGATGAACAGTTTATCCTCCTCTTTCTTCTAATATTGCTCATAGAGGATCTTCAGTAGATTTAGCAATTTTTAGATTACATTTAGCAGGAATTTCATCAATTTTAGGAGCTGTTAATTTTATTACAACTGTAATTAATATACGTTCTCCAGGGATAACTTTAGATAAAATACCTTTATTTGTTTGATCTGTAGCTATTACTGCTTTATTATTACTTTTATCTTTACCAGTATTAGCAGGAGCTATTACTATATTATTAACAGATCGAAATTTAAATACTTCTTTTTTTGATCCTGCAGGAGGAGGAGACCC…
Ptomaphagus medius		RMNH.INS.63370	France	Ariège: Soula	2013-09-01	Stefan Visser & Wesley van Oostenbrugge	Menno Schilthuizen	439 bp (BOLD: CHOLH248-13)	TCGAATAAATAATATGAGATTTTGACTTTTACCCCCTTCATTAACTTTATTATTAATAAGAAGAATAGTGGAAAATGGAGCAGGGACTGGATGAACAGTTTATCCTCCTCTTTCTTCTAATATTGCTCATAGAGGATCTTCAGTAGATTTAGCAATTTTTAGATTACATTTAGCAGGAATTTCATCAATTTTAGGAGCTGTTAATTTTATTACAACTGTAATTAATATACGTTCTCCAGGGATAACTTTAGATAAAATACCTTTATTTGTTTGATCTGTAGCTATTACTGCTTTATTATTACTTTTATCTTTACCAGTATTAGCAGGAGCTATTACTATATTATTAACAGATCGAAATTTAAATACTTCTTTTTTTGATCCTGCAGGAGGAGGAGACCC…
Ptomaphagus medius		RMNH.INS.63371	France	Ariège: Soula	2013-09-01	Stefan Visser & Wesley van Oostenbrugge	Menno Schilthuizen	439 bp (BOLD: CHOLH249-13)	TCGAATAAATAATATGAGATTTTGACTTTTACCCCCTTCATTAACTTTATTATTAATAAGAAGAATAGTGGAAAATGGAGCAGGGACTGGATGAACAGTTTATCCTCCTCTTTCTTCTAATATTGCTCATAGAGGATCTTCAGTAGATTTAGCAATTTTTAGATTACATTTAGCAGGAATTTCATCAATTTTAGGAGCTGTTAATTTTATTACAACTGTAATTAATATACGTTCTCCAGGGATAACTTTAGATAAAATACCTTTATTTGTTTGATCTGTAGCTATTACTGCTTTATTATTACTTTTATCTTTACCAGTATTAGCAGGAGCTATTACTATATTATTAACAGATCGAAATTTAAATACTTCTTTTTTTGATCCTGCAGGAGGAGGAGACCC…
Ptomaphagus clavalis		RMNH.INS.63372	Spain	Mallorca: Peninsula de Llevant	2017-04-21	M. Schilthuizen & I. Njunjić	Menno Schilthuizen	439 bp (BOLD: CHOLH316-18)	TCGAATAAATAATATAAGATTKTGACTTTTACCTCHYTCATTAACAWTATTACTAATAAGAAGAATAGTGGAAAATGGGGCAGGTACTGGTTGAACAGTATACCCACCATTATCTTCTAATATTGCTCATAGAGGATCTTCAGTAGATCTTGCAATTTTTAGATTACATTTAGCAGGAATTTCTTCAATTTTAGGAGCTGTAAATTTTATTACTACAGTTATTAATATACGTTCACCAGGAATAACTTTAGATAAAATACCATTATTTGTGTGATCAGTAGTTATTACTGCTTTACTTTTACTTTTATCTCTTCCAGTATTAGCAGGTGCTATTACAATACTATTAACTGATCGAAATTTAAATACTTCTTTTTTTGATCCTGCAGGAGGAGGAGATCC…
Ptomaphagus clavalis		RMNH.INS.63373	Spain	Mallorca: Peninsula de Llevant	2017-04-21	M. Schilthuizen & I. Njunjić	Menno Schilthuizen	439 bp (BOLD: CHOLH317-18)	TCGAATAAATAATATAAGATTTTGACTTTTACCTCCTTCATTAACATTATTACTAATAAGAAGAATAGTGGAAAATGGGGCAGGTACTGGTTGAACAGTATACCCACCATTATCTTCTAATATTGCTCATAGAGGATCTTCAGTAGATCTTGCAATTTTTAGATTACATTTAGCAGGAATTTCTTCAATTTTAGGAGCTGTAAATTTTATTACTACAGTTATTAACATACGTTCACCAGGAATAACTTTAGATAAAATACCATTATTTGTGTGATCAGTAGTTATTACTGCTTTACTTTTACTTTTATCTCTTCCAGTATTAGCAGGTGCTATTACAATACTATTAACTGATCGAAATTTAAATACTTCTTTTTTTGATCCTGCAGGAGGAGGAGATCC…
Ptomaphagus cf. chendae		RMNH.INS.63374	Montenegro	Kameno More	2017-07-25	M. Schilthuizen & I. Njunjić	Menno Schilthuizen	471 bp (BOLD: CHOLH318-19)	GGATCACCTGATATAGCATTCCCACGAATAAATAATATAAGATTTTGACTTTTACCCCCTTCATTAACTTTACTATTAATAAGAAGAATAGTAGAAAATGGGGCAGGTACTGGATGAACAGTTTACCCTCCTCTTTCTTCAAATATTGCTCACAGAGGTTCTTCTGTAGATTTAGCTATTTTTAGATTACATTTAGCAGGAATTTCCTCAATTTTAGGAGCTGTAAATTTTATTACAACTGTAATTAATATACGTTCTCCAGGCATATCTTTAGATAAAATACCTTTATTTGTTTGATCAGTTGTTATTACTGCATTATTACTTCTTCTATCTCTTCCAGTATTAGCAGGAGCTATCACAATATTATTAACAGATCGTAATCTTAATACTTCATTTTTT…
Ptomaphagus cf. chendae		RMNH.INS.63375	Montenegro	Kameno More	2017-07-25	M. Schilthuizen & I. Njunjić	Menno Schilthuizen	473 bp (BOLD: CHOLH319-19)	GCATTCCCACGAATAAATAATATAAGATTTTGACTTTTACCCCCTTCATTAACTTTACTATTAATAAGAAGAATAGTAGAAAATGGGGCAGGTACTGGATGAACAGTTTACCCTCCTCTTTCTTCAAATATTGCTCACAGAGGTTCTTCTGTAGATTTAGCTATTTTTAGATTACATTTAGCAGGAATTTCCTCAATTTTAGGAGCTGTAAATTTTATTACAACTGTAATTAATATACGTTCTCCAGGCATATCTTTAGATAAAATACCTTTATTTGTTTGATCAGTTGTTATTACTGCATTATTACTTCTTCTATCTCTTCCAGTATTAGCAGGAGCTATCACAATATTATTAACAGATCGTAATCTTAATACTTCATTTTTTGATCCTGCAGGAGGA…
Ptomaphagus subvillosus		ZMUO.001065	Finland	Aland Isl.: Mariehamn	2011-10-11	Mikko Pentinsaari	Mikko Pentinsaari	407 bp (BOLD: KJ964388)	TAAGATTTTGACTTTTACCCCCTTCATTAACATTACTTTTAATAAGAAGAATAGTTGAAAATGGAGCAGGAACTGGTTGGACAGTTTACCCCCCACTATCTTCCAATATTGCTCATAGAGGATCCTCTGTAGATCTTGCAATTTTTAGTTTACATTTAGCAGGAATTTCCTCAATTTTAGGAGCCGTAAATTTTATTACTACAGTAATTAATATACGTTCTCCAGGAATAACATTAGATAAAATACCATTATTTGTTTGATCAGTAGTTATTACTGCTTTACTTTTACTTTTATCTCTCCCAGTATTAGCAGGAGCAATTACAATATTATTAACTGACCGAAATTTAAATACTTCTTTTTTTGACCCAGCAGGGGGAGGAGACCCAATTTTATATCAAC…
Ptomaphagus subvillosus		ZMUO.001066	Finland	Aland Isl.: Mariehamn	2011-10-11	Mikko Pentinsaari	Mikko Pentinsaari	407 bp (BOLD: KJ967337)	TAAGATTTTGACTTTTACCCCCTTCATTAACATTACTTTTAATAAGAAGAATAGTTGAAAATGGAGCAGGAACTGGTTGGACAGTTTACCCCCCACTATCTTCCAATATTGCTCATAGAGGATCCTCTGTAGATCTTGCAATTTTTAGTTTACATTTAGCAGGAATTTCCTCAATTTTAGGAGCCGTAAATTTTATTACTACAGTAATTAATATACGTTCTCCAGGAATAACATTAGATAAAATACCATTATTTGTTTGATCAGTAGTTATTACTGCTTTACTTTTACTTTTATCTCTCCCAGTATTAGCAGGAGCAATTACAATATTATTAACTGACCGAAATTTAAATACTTCTTTTTTTGACCCAGCAGGGGGAGGAGACCCAATTTTATATCAAC…
Ptomaphagus hatchi		HM245885	USA	Tennessee: Walker Spring Cave		?	?	534 bp (Genbank: HM245885)	GGAAGATTAATTGGTGATGATCAAATTTATAATGTAATTGTTACTGCACACGCTTTTATCATAATTTTTTTTATGGTAATGCCTATTATAATTGGAGGATTTGGAAATTGATTAGTTCCTTTGATACTAGGAGCCCCTGATATAGCTTTTCCCCGAATAAATAATATGAGATTTTGATTACTTCCTCCTTCACTCTCCCTACTTCTAATAAGAAGGATAGTGGAAAATGGAGCAGGAACAGGGTGAACAGTTTACCCACCACTTTCAGCAAATATTGCTCATAGTGGATCTTCTGTTGATTTAGCAATTTTTAGACTCCATTTAGCTGGAATCTCTTCAATTTTAGGGGCAGTAAATTTTATCACCACAGTAATTAATATACGATCACCTGGGATAACA…
Ptomaphagus thebeatles		TXEX.NL0001	The Netherlands	Noord-Holland: Amsterdam: Vondelpark: Koeienweide	2019-03-25	Taxon Expeditions	Menno Schilthuizen	435 bp (BOLD: TXEX021-19)	AATAAATAATATAAGATTTTGACTTTTACCACCTTCATTAACTTTATTATTAATGAGAAGAATAGTAGAAAATGGAGCAGGAACTGGATGAACAGTTTATCCTCCTCTTTCTTCTAATATTGCTCATAGAGGATCTTCAGTAGATTTAGCAATTTTTAGATTACATTTAGCAGGAATTTCATCAATTTTAGGAGCTGTTAATTTTATTACAACTGTAATTAATATACGTTCTCCAGGAATAACTTTAGATAAAATACCTTTATTTGTTTGATCTGTAGCTATTACTGCTTTATTACTACTTTTATCTTTACCAGTATTAGCAGGAGCTATTACTATATTATTAACAGATCGAAATTTAAATACTTCTTTTTTTGATCCTGCAGGAGGAGGAGATCCTAT…
Ptomaphagus thebeatles		TXEX.NL0002	The Netherlands	Noord-Holland: Amsterdam: Vondelpark: Koeienweide	2019-03-25	Taxon Expeditions	Menno Schilthuizen	436 bp (BOLD: TXEX020-19)	AATAAATAATATAAGATTTTGACTTTTACCACCTTCATTAACTTTATTATTAATGAGAAGAATAGTAGAAAATGGAGCAGGAACTGGATGAACAGTTTATCCTCCTCTTTCTTCTAATATTGCTCATAGAGGATCTTCAGTAGATTTAGCAATTTTTAGATTACATTTAGCAGGAATTTCATCAATTTTAGGAGCTGTTAATTTTATTACAACTGTAATTAATATACGTTCTCCAGGAATAACTTTAGATAAAATACCTTTATTTGTTTGATCTGTAGCTATTACTGCTTTATTACTACTTTTATCTTTACCAGTATTAGCAGGAGCTATTACTATATTATTAACAGATCGAAATTTAAATACTTCTTTTTTTGATCCTGCAGGAGGAGGAGATCCTAT…
Ptomaphagus sp.		UAMU840-14	USA	Alaska: PoW Is. Luck Lk. 1 Rd.	18 May 2010	J. Stockbridge, C. Bickford		346 bp (BOLD: UAMU840-14)	TAAGATTTTGACTTCTCCCCCCGTCATTAACTTTATTATTAATAAGAAGAATAGTAGAAAGAGGAGCAGGAACAGGTTGAACTGTTTATCCTCCTTTATCATCTAATATTGCTCATGGAGGATCCTCAGTTGATTTAGCTATTTTTAGTTTACATTTAGCAGGTATCTCTTCTATTTTAGGTGCAGTTAATTTTATTACTACTGTCAGTTCTAGCAGGTGCAATTACTATACTTTTAACAGACCGAAACTTGATTACCTTTATTTGTTTGATCTGTTGCAATTACAGCCTTACTTTTACTTTTATCTTTACTATTAATATACGTTCACCTAACCTAACTTATGATC
Ptomaphagus medius		ZFMK.TIS.2500504	Germany	Thuringia: Wartburgkreis, Stockhausen/Eisenach, SE, Nesseufer	2013-05-02	GBOL-Team ZFMK	Wolfgang Apfel	658 bp (genbank KU915745.1)	GACCTTATACTTTATTTTTGGAGCATGAGCAGGAATAGTAGGTACTTCTTTAAGACTTTTAATTCGAGCAGAATTAGGAAACCCGGGTAGATTAATTGGTGATGATCAAATTTATAATGTAATTGTTACTGCCCACGCTTTTATTATAATTTTTTTCATAGTTATACCAATCATAATTGGAGGATTTGGAAATTGATTAGTACCTTTAATATTAGGAGCTCCTGATATAGCATTTCCTCGAATAAACAATATAAGATTTTGACTTTTACCTCCTTCATTAACTTTATTATTAATAAGAAGAATAGTTGAAAACGGAGCAGGAACTGGATGAACAGTTTATCCTCCTCTATCTTCTAATATTGCTCATAGAGGATCTTCAGTAGATTTAGCAATTTTTAG…
Ptomaphagus medius		ZFMK.TIS.2500505	Germany	Thuringia: Wartburgkreis, Stockhausen/Eisenach, SE, Nesseufer	2013-05-02	GBOL-Team ZFMK	Wolfgang Apfel	658 bp (genbank KU917567.1)	GACCTTATACTTTATTTTTGGAGCATGAGCAGGAATAGTAGGTACTTCTTTAAGACTTTTAATTCGAGCAGAATTAGGAAACCCGGGTAGATTAATTGGTGATGATCAAATTTATAATGTAATTGTTACTGCCCACGCTTTTATTATAATTTTTTTCATAGTTATACCAATCATAATTGGAGGATTTGGAAATTGATTAGTACCTTTAATATTAGGAGCTCCTGATATAGCATTTCCTCGAATAAACAATATAAGATTTTGACTTTTACCTCCTTCATTAACTTTATTATTAATAAGAAGAATAGTTGAAAACGGAGCAGGAACTGGATGAACAGTTTATCCTCCTCTATCTTCTAATATTGCTCATAGAGGATCTTCAGTAGATTTAGCAATTTTTAG…
Ptomaphagus medius		ZFMK.TIS.2500507	Germany	Thuringia: Wartburgkreis, Stockhausen/Eisenach, SE, Nesseufer	2013-05-02	GBOL-Team ZFMK	Wolfgang Apfel	658 bp (genbank KU907522.1)	GACCTTATACTTTATTTTTGGAGCATGAGCAGGAATAGTAGGTACTTCTTTAAGACTTTTAATTCGAGCAGAATTAGGAAACCCGGGTAGATTAATTGGTGATGATCAAATTTATAATGTAATTGTTACTGCCCACGCTTTTATTATAATTTTTTTCATAGTTATACCAATCATAATTGGAGGATTTGGAAATTGATTAGTACCTTTAATATTAGGAGCTCCTGATATAGCATTTCCTCGAATAAACAATATAAGATTTTGACTTTTACCTCCTTCATTAACTTTATTATTAATAAGAAGAATAGTTGAAAACGGAGCAGGAACTGGATGAACAGTTTATCCTCCTCTATCTTCTAATATTGCTCATAGAGGATCTTCAGTAGATTTAGCAATTTTTAG…
Ptomaphagus medius		ZFMK.TIS.2500569	Germany	Thuringia: Wartburgkreis, Stockhausen/Eisenach, SE, Nesseufer	2013-05-02	GBOL-Team ZFMK	Wolfgang Apfel	658 bp (genbank KU917929.1)	GACCTTATACTTTATTTTTGGAGCATGAGCAGGAATAGTAGGTACTTCTTTAAGACTTTTAATTCGAGCAGAATTAGGAAACCCGGGTAGATTAATTGGTGATGATCAAATTTATAATGTAATTGTTACTGCCCACGCTTTTATTATAATTTTTTTCATAGTTATACCAATCATAATTGGAGGATTTGGAAATTGATTAGTACCTTTAATATTAGGAGCTCCTGATATAGCATTTCCTCGAATAAACAATATAAGATTTTGACTTTTACCTCCTTCATTAACTTTATTATTAATAAGAAGAATAGTTGAAAACGGAGCAGGAACTGGATGAACAGTTTATCCTCCTCTATCTTCTAATATTGCTCATAGAGGATCTTCAGTAGATTTAGCAATTTTTAG…
Ptomaphagus medius		ZFMK.TIS.2519406	Germany	Saxony-Anhalt, Halberstadt, Lkr. Harz, Huy, Paulskopf	2014-03-02	GBOL-Team ZFMK	Manfred Jung	658 bp (genbank KU914560.1)	GACCTTATACTTTATTTTTGGAGCATGAGCAGGAATAGTAGGTACTTCTTTAAGACTTTTAATTCGAGCAGAATTAGGAAACCCGGGTAGATTAATTGGTGATGATCAAATTTATAATGTAATTGTTACTGCCCACGCTTTTATTATAATTTTTTTCATAGTTATACCAATCATAATTGGAGGATTTGGAAATTGATTAGTACCTTTAATATTAGGAGCTCCTGATATAGCATTTCCTCGAATAAACAATATAAGATTTTGACTTTTACCTCCTTCATTAACTTTATTATTAATAAGAAGAATAGTTGAAAACGGAGCAGGAACTGGATGAACAGTTTATCCTCCTCTATCTTCTAATATTGCTCATAGAGGATCTTCAGTAGATTTAGCAATTTTTAG…
Ptomaphagus thebeatles		ZFMK.TIS.2537758	Germany	Saxony-Anhalt, Halberstadt, Landkreis Harz, Huy noerdlich von Athenstedt	2014-08-28	GBOL-Team ZFMK	Manfred Jung	658 bp (genbank KU912062.1)	GACCTTATATTTTATTTTTGGAGCATGAGCAGGAATAGTAGGTACTTCTTTAAGATTATTAATTCGAGCAGAATTAGGAAATCCTGGAAGATTAATTGGTGATGATCAAATTTATAATGTAATTGTAACTGCTCACGCTTTCATTATAATTTTTTTCATGGTTATACCAATTATAATTGGAGGGTTTGGAAATTGATTAGTTCCTTTAATATTAGGAGCTCCTGATATAGCTTTCCCTCGAATAAATAATATAAGATTTTGACTTTTACCACCTTCATTAACTTTATTATTAATGAGAAGAATAGTAGAAAATGGAGCAGGAACTGGATGAACAGTTTATCCTCCTCTTTCTTCTAATATTGCTCATAGAGGATCTTCAGTAGATTTAGCAATTTTTAG…
Ptomaphagus varicornis		ZFMK.TIS.2543667	Germany	Saxony-Anhalt, Halberstadt, Lkr. Harz, Umg. Mahndorf	2015-03-24	GBOL-Team ZFMK	Manfred Jung	658 bp (genbank KU912824.1)	AACCTTATATTTTATTTTTGGAGCATGAGCCGGAATAGTAGGTACATCTCTAAGATTATTAATTCGAGCAGAATTGGGAAACCCAGGAAGATTAATTGGGGACGACCAAATCTATAATGTAATTGTTACAGCTCATGCTTTTATTATAATTTTTTTTATAGTAATACCAATTATAATTGGTGGATTTGGTAATTGATTAGTACCTTTAATATTAGGGGCTCCTGATATAGCATTTCCCCGTATAAATAATATAAGATTTTGGTTATTACCTCCATCTCTTTCACTTCTTTTAATAAGAAGAATAGTAGAAAATGGTGCTGGAACTGGTTGAACGGTTTATCCCCCCCTTTCATCTAATATTGCACATAGAGGATCTTCAGTAGATTTAGCAATTTTTAG…
Ptomaphagus varicornis		ZFMK.TIS.2543671	Germany	Saxony-Anhalt	2015-03-25	GBOL-Team ZFMK	Manfred Jung	658 bp (genbank KU915120.1)	AACCTTATATTTTATTTTTGGAGCATGAGCCGGAATAGTAGGTACATCTCTAAGATTATTAATTCGAGCAGAATTGGGAAACCCAGGAAGATTAATTGGGGACGACCAAATCTATAATGTAATTGTTACAGCTCATGCTTTTATTATAATTTTTTTTATAGTAATACCAATTATAATTGGTGGATTTGGTAATTGATTAGTACCTTTAATATTAGGGGCTCCTGATATAGCATTTCCCCGTATAAATAATATAAGATTTTGGTTATTACCTCCATCTCTTTCACTTCTTTTAATAAGAAGAATAGTAGAAAATGGTGCTGGAACTGGTTGAACGGTTTATCCCCCCCTTTCATCTAATATTGCACATAGAGGATCTTCAGTAGATTTAGCAATTTTTAG…
