# Supplementary material
Source: publisher figshare collection journal article supplement (https://brill.figshare.com/articles/dataset/_/12249788)
Supplement: Supplementary file 1 [file 1]

***Ptomaphagus thebeatles* n. sp., a previously unrecognized beetle  
from Europe, with remarks on urban taxonomy and recent range  
expansion (Coleoptera: Leiodidae)**

*Menno Schilthuisen*

Naturalis Biodiversity Center, Darwinweg 2, 2333 CR Leiden, The Netherlands

Taxon Expeditions, Rembrandtstraat 20, 2311 VW Leiden, The Netherlands

Institute of Biology Leiden, Leiden University, Sylviusweg 72, 2333 BE Leiden, the  
Netherlands

*menno.schilthuisen@naturalis.nl*

*Wesley van Oostenbrugge*

Naturalis Biodiversity Center, Darwinweg 2, 2333 CR Leiden, The Netherlands

Department of Forensic Research, Hogeschool van Amsterdam, Weesperzijde 190,  
1097 DZ Amsterdam, The Netherlands

*Stefan Visser*

Naturalis Biodiversity Center, Darwinweg 2, 2333 CR Leiden, The Netherlands

Department of Forensic Research, Hogeschool van Amsterdam, Weesperzijde 190,  
1097 DZ Amsterdam, The Netherlands

*Marrit van der Meer*

Taxon Expeditions, Rembrandtstraat 20, 2311 VW Leiden, The Netherlands

*Richard Delval*

Taxon Expeditions, Rembrandtstraat 20, 2311 VW Leiden, The Netherlands

*Claudia Dias*

Taxon Expeditions, Rembrandtstraat 20, 2311 VW Leiden, The Netherlands

*Heko Köster*

Taxon Expeditions, Rembrandtstraat 20, 2311 VW Leiden, The Netherlands

*Rudie Maarschall*

Taxon Expeditions, Rembrandtstraat 20, 2311 VW Leiden, The Netherlands

*Norbert Peeters*

Taxon Expeditions, Rembrandtstraat 20, 2311 VW Leiden, The Netherlands

*Peter Venema*

Taxon Expeditions, Rembrandtstraat 20, 2311 VW Leiden, The Netherlands

*Ryan Zaremba*

Taxon Expeditions, Rembrandtstraat 20, 2311 VW Leiden, The Netherlands

Francis W. Parker School, 330 West Webster Avenue, Chicago, Illinois 60614, USA

*Cristina Beltrami*

Taxon Expeditions, Rembrandtstraat 20, 2311 VW Leiden, The Netherlands

Department of Biotechnology, University of Verona, Strada Le Grazie 15, 37134

Verona, Italy

*Marzia Rossato*

Department of Biotechnology, University of Verona, Strada Le Grazie 15, 37134

Verona, Italy

*Leonardo Latella*

Museo Civico di Storia Naturale of Verona, Lungadige Porta Vittoria 9, I-37129

Verona, Italy

*Florinda Nieuwenhuis*

Gemeente Amsterdam, Ruimte en Duurzaamheid, Weesperplein 8, 1018 XA  
Amsterdam, The Netherlands

*Nicole de Rop*

Gemeente Amsterdam, Ruimte en Duurzaamheid, Weesperplein 8, 1018 XA  
Amsterdam, The Netherlands

*Iva Njunjić*

Taxon Expeditions, Rembrandtstraat 20, 2311 VW Leiden, The Netherlands  
Naturalis Biodiversity Center, Darwinweg 2, 2333 CR Leiden, The Netherlands

*Michel Perreau*

UT Paris Diderot, Université de Paris, 20 quater rue du département, 75018 Paris,  
France

*Joris M. Koene*

Taxon Expeditions, Rembrandtstraat 20, 2311 VW Leiden, The Netherlands  
Vrije Universiteit, De Boelelaan 1085, 1081 HV Amsterdam, The Netherlands

## Supplementary material

TABLE S1 Material used for the molecular phylogenetic analysis, with COI DNA barcode sequences added
